# 1 The Proteomic Architecture of Schizophrenia Cerebral Organoids 2 Reveals Alterations in GWAS and Neuronal Development Factors

3  
4 Michael Notaras<sup>1</sup>, Aiman Lodhi<sup>1</sup>, Haoyun Fang<sup>5</sup>, David Greening<sup>3,4,5,6,\*</sup>, and Dilek  
5 Colak<sup>1,7,\*</sup>

6  
7 <sup>1</sup> Center for Neurogenetics, Feil Family Brain and Mind Research Institute, Weill  
8 Cornell Medical College, Cornell University, New York, New York, USA.

9 <sup>2</sup> Department of Physiology and Biophysics, Weill Cornell Medical College, Cornell  
10 University, New York, New York, USA.

11 <sup>3</sup> La Trobe Institute for Molecular Science, La Trobe University, Melbourne,  
12 Australia.

13 <sup>4</sup> Central Clinical School, Monash University, Melbourne, Australia.

14 <sup>5</sup> Baker Institute for Heart and Diabetes, Melbourne, Australia.

15 <sup>6</sup> Baker Department of Cardiometabolic Health, University of Melbourne,  
16 Melbourne, Australia.

17 <sup>7</sup> Gale and Ira Drukier Institute for Children's Health, Weill Cornell Medical College,  
18 Cornell University, New York, New York, USA.

19  
20 \*Correspondence to David Greening (for bioinformatics queries) at  
21 [david.greening@baker.edu](mailto:david.greening@baker.edu) or Dilek Colak (organoid queries) at  
22 [dic2009@med.cornell.edu](mailto:dic2009@med.cornell.edu)  
23  
24

25 **Keywords:** Cerebral organoid, induced pluripotent stem cells, iPSCs,  
26 Schizophrenia, psychosis, proteomics, isotopic quantitative proteomics, PTN,  
27 pleiotrophin, PTN, podocalyxin, PODXL, SV2A, MAP2, neuron development,  
28 neurodevelopment, neurodevelopmental disorder.  
29  
30  
31  
32  
33  
34  
35  
36  
37  
38  
39  
40  
41  
42  
43

44 **ABSTRACT**

45

46 Schizophrenia (Scz) is a brain disorder that has a typical onset in early adulthood  
47 but otherwise maintains unknown disease origins. Unfortunately, little progress has  
48 been made in understanding the molecular mechanisms underlying  
49 neurodevelopment of Scz due to ethical and technical limitations in accessing  
50 developing human brain tissue. To overcome this challenge, we have previously  
51 utilized patient-derived Induced Pluripotent Stem Cells (iPSCs) to generate self-  
52 developing, self-maturing, and self-organizing 3D brain-like tissue known as  
53 cerebral organoids. As a continuation of this prior work [1], here we provide a  
54 molecular architectural map of the developing Scz organoid proteome. Utilizing  
55 iPSCs from  $n = 25$  human donors ( $n = 8$  healthy Ctrl donors, and  $n = 17$  Scz  
56 patients), we generated 3D human cerebral organoids, employed 16-plex isobaric  
57 sample-barcoding chemistry, and simultaneously subjected samples to  
58 comprehensive high-throughput liquid-chromatography/mass-spectrometry  
59 (LC/MS) quantitative proteomics. Of 3,705 proteins identified by high-throughput  
60 proteomic profiling, we identified that just ~2.62% of the organoid global proteomic  
61 landscape was differentially regulated in Scz organoids. In sum, just 43 proteins  
62 were up-regulated and 54 were down-regulated in Scz patient-derived organoids.  
63 Notably, a range of neuronal factors were depleted in Scz organoids (e.g., MAP2,  
64 TUBB3, SV2A, GAP43, CRABP1, NCAM1 etc.). Based on global enrichment  
65 analysis, alterations in key pathways that regulate nervous system development  
66 (e.g., axonogenesis, axon development, axon guidance, morphogenesis pathways  
67 regulating neuronal differentiation, as well as substantia nigra development) were  
68 perturbed in Scz patient-derived organoids. We also identified prominent  
69 alterations in two novel GWAS factors, Pleiotrophin (PTN) and Podocalyxin  
70 (PODXL), in Scz organoids. In sum, this work serves as both a report and a  
71 resource whereby researchers can leverage human-derived neurodevelopmental  
72 data from Scz patients, which can be used to mine, compare, contrast, or  
73 orthogonally validate novel factors and pathways related to Scz risk identified in  
74 datasets from observational clinical studies and other model systems.

75

76

77

78

79

80

81

82

83

84

## 85 INTRODUCTION

86 Schizophrenia (Scz) is a debilitating brain disorder that occurs in  
87 approximately ~1% of the population. While Scz onset typically occurs in early  
88 adulthood, subtle brain changes and symptoms often begin emerging years prior to  
89 onset during the so-called “prodromal period” [2, 3]. In spite of this, it has remained  
90 unclear when Scz neuropathology actually begins to unfold in the brain [1]. For  
91 instance, does Scz neuropathology begin a couple of years prior to onset in  
92 adolescence when prodromal features progressively emerge? Or does Scz  
93 neuropathology begin much earlier in neurodevelopment at a scale that is not yet  
94 resolvable? Following decades of investigation, there is now strong  
95 epidemiological evidence that indicates risk of Scz may begin to accumulate during  
96 *in utero* brain development [4-7]. This includes data from numerous, independent,  
97 large-scale populations [4-7]. Critically, it remains unclear if *in utero* risk factors for  
98 later Scz onset, such as maternal immune activation, famine, or hormonal/steroid  
99 factors, elicit risk by inducing neurodevelopmental alterations or promoting rates of  
100 *de novo* mutation [8]. While the latter can’t be ruled out as a potential etiological  
101 contributor, the former hypothesis holds strong merit given the highly-regulated  
102 nature of cortical development *in utero* and the fact that innumerable Scz risk  
103 factors exhibit known roles in central nervous system development. Indeed, some  
104 novel biological intermediaries are starting to be discovered which link *in utero*  
105 environmental risk factors to potential genetic factors, alterations, and/or  
106 vulnerabilities [9]. However, resolving these neurodevelopmental hypotheses of  
107 Scz has been difficult. Critically, ethical and technical constraints in accessing  
108 human primary brain tissue have arrested progress in delineating the  
109 neurodevelopmental trajectory of Scz. These ethical and technical limitations are  
110 further compounded by our inability to identify prospective cases of Scz, which has  
111 further sequestered our understanding of neurodevelopmental mechanisms of  
112 psychosis and has caused a rift between the known epidemiology and the  
113 presumed neurobiology of Scz. For instance, in the largest GWAS conducted to  
114 date a total of 108 loci of risk were identified – yet, many of these loci (e.g. PTN or  
115 PODXL) had unknown disease relevance as well as ambiguously defined  
116 neurobiology. Without a means to dissect these factors in human-derived tissue, it  
117 is possible that identifying the molecular mediators underlying the ontogeny of  
118 disease onset in Scz may continue to be protracted.

119 Recently, we attempted to overcome these technical and ethical limitations  
120 to model early neuropathological features of Scz within human-derived tissue.  
121 Namely, we modeled the neurodevelopmental pathology of Scz by harnessing  
122 human induced pluripotent stem cells (iPSCs) from healthy adults (Ctrls) and  
123 idiopathic Scz patients to generate 3D brain-like tissue known as “cerebral  
124 organoids” [1]. Cerebral organoids allow human-specific mechanisms of neural  
125 development to be studied while capturing the entirety of the molecular-genetic

126 background of patients. This is a particularly useful model system with respect to  
127 “black box” diseases such as Scz, whose neurodevelopmental origins have  
128 remained unclear, as it allows spontaneously-emerging neural tissue that is self-  
129 organizing and self-maturing tissue to be generated from human donors. Thus, 3D  
130 stem cell derived methodologies provide access to a limitless supply of human-  
131 derived tissue which can be used to dissect complex diseases defined by  
132 “*daunting polygenicity*” [10] under controlled laboratory conditions [11]. Cerebral  
133 organoids mimic trimester 1 of early brain development and putatively recapitulate  
134 the epigenetic [12], transcriptomic [13, 14], and proteomic [1, 11] architecture that  
135 is expected of the developing mammalian brain. This also includes the  
136 recapitulation of cortical cell-type diversity and cellular events such as migration  
137 [15] and evolutionary mechanisms that support neocortical neurogenesis [16].  
138 Because of this, cerebral organoids have already been used to model prenatal  
139 drug/narcotic effects [11], microcephaly [17], macrocephaly [18], Zika virus [19,  
140 20], features of autism [21-23], microdeletion syndromes [24] including 22q11  
141 deletion syndrome [25], hypoxic injury [26], and novel neuropathology of Scz [1,  
142 27-31]. In the case of the latter, Scz-related organoid models have revealed a  
143 range of novel phenotypes that may be associated with early neurodevelopmental  
144 alterations. This includes diminished responses to electrophysiological stimulation  
145 and depolarization [27], alterations in growth factor pathways (e.g. FGFR1 [28] and  
146 neurotrophic growth factors and their receptors in Scz progenitors and neurons  
147 [1]), immune-related alterations (e.g. TNF $\alpha$  [29] and IFITM3 as well as IL6ST in  
148 Scz neurons [1]), potential developmental effects in excitation and inhibition [30],  
149 and DISC1 effects upon neurodevelopment [31, 32]. Recently, we added to this  
150 developing literature by being the first to discover that Scz neuropathology is  
151 encoded on a cell-by-cell basis and is defined by multiple novel mechanisms in  
152 Scz patient-derived organoids [1]. However, we have also predicted that further  
153 mechanisms related to neurodevelopment of Scz remain to be discovered [1], thus  
154 requiring deeper analysis in larger samples and populations.

155 Here we sought to expand our existing knowledge of Scz by providing a  
156 deep, unbiased, analysis of molecular factors regulating central nervous system  
157 development in human-derived 3D tissue. To do this, we generated cerebral  
158 organoids from a relatively large pool of human donors ( $n = 25$ ;  $n = 8$  Ctrl donors  
159 and  $n = 17$  Scz donors) and adapted cutting-edge isobaric barcoding chemistry so  
160 that samples could be condensed and analytically deconstructed simultaneously  
161 via liquid-chromatography/mass-spectrometry (LC/MS). This yielded a large  
162 dataset that we have made freely available for other human, mouse, and cellular  
163 researchers to analyze. Notably, here we emphasize large-scale changes  
164 identified in this dataset, which included a broad reduction in neuronal molecules  
165 important for neural cell-type identity and development as well as metabolic and

166 novel GWAS factors. This work and dataset may thus provide insight for other  
167 researchers and labs that have an interest in biological data from human-derived  
168 3D stem cell systems but otherwise employ or use other model systems.

169

## 170 **RESULTS**

171 To study the molecular architecture of developing human brain-like tissue,  
172 we generated 3D cerebral organoids from human iPSC donors banked by the  
173 NIMH. In sum, biologics from  $n = 25$  human donors were sampled comprising  $n = 8$   
174 healthy Ctrl and  $n = 17$  Scz patients. Briefly, iPSCs from human donors were  
175 grown in 2D culture atop vitronectin-coated plates before being dissociated with  
176 Accutase to yield single-cell iPSCs suspensions. Stem cell suspensions were  
177 correspondingly cultured into 3D aggregates, known as embryoid bodies, before  
178 being subjected to a chemically minimalist neural induction media for up to 7 days  
179 *in vitro* (DIV). After exhibiting evidence of neuroepithelial expansions and/or other  
180 morphological evidence of neural induction, tissue was impregnated into a matrigel  
181 droplet as a scaffold for further tissue expansion. Developing organoids were then  
182 matured under constant agitation atop an orbital shaker. Following this, at  
183 approximately 35-40 DIV, organoids from all 25 human donors were sampled for  
184 TMT quantitative proteomics. Briefly, this involved dissociating organoids,  
185 preparing peptide suspensions (digestion, reduction, and alkylation), barcoding  
186 samples with isobaric TMTpro 16-plex chemistry, and then multiplexing samples  
187 for simultaneous detection and analysis via nano high-sensitivity proteome profiling  
188 (for a simplified schematic of our experimental pipeline, see Fig. 1).

189 Analysis of organoid proteomes revealed sufficient peptide coverage for  
190 high-confidence quantitative analysis of 3705 proteins (peptide >1; intensity > 0)  
191 across all 25 human donor samples. Based on Log<sub>2</sub> transformed protein  
192 intensities, the Coefficient of Variation (CV) of Scz and Ctrl proteome groups was  
193 highly stringent; Median CV for Ctrl was 1.07% and for Scz 1.23%. This provided  
194 confidence in both the degree of neural induction achieved between samples, and  
195 that organoids were overall of a very similar and thus comparable composition  
196 between iPSC donors and within groups.

197 To gain insight into differences between Scz and Ctrl organoids, we next  
198 sought to determine which proteins (based on their expression) differed between  
199 these groups. Further analysis revealed the significant differential expression of  
200 peptide fragments belonging to 97 proteins in Scz organoids, of which 43 were up-  
201 regulated ( $p$  value < 0.05, Log<sub>2</sub>FC > 0.05) and 54 were down-regulated ( $p$  value <  
202 0.05, Log<sub>2</sub>FC < -0.05). Thus, in sum, ~2.62% of the total organoid proteome was  
203 differentially expressed in Scz organoids, with equivalent (~1.16% vs. ~1.46%)  
204 proportions of differentially expressed proteins being up- and down-regulated,  
205 respectively.

206 Deeper examination of significantly down-regulated proteins in Scz  
207 organoids, sorted by Log2FC values (see Table 1), revealed several important  
208 changes. Notably, we detected a depletion of factors that support neuronal  
209 development, differentiation, identity and/or function. Down-regulated neuronal  
210 development factors in Scz organoids comprised Neuromodulin (GAP43; Log2FC  
211 = -1.183,  $p = 0.010$ ), Cellular Retinoic Acid-Binding Protein 1 (CRABP1; Log2FC =  
212 -1.018,  $p = 0.016$ ), Neural Cell Adhesion Molecule (NCAM1; Log2FC = -0.854,  $p <$   
213 0.014), and expression of the myelin-modulating factor Myelin Expression Factor 2  
214 (MYEF2; Log2FC = -0.537,  $p < 0.001$ ). Likewise, down-regulated expression of  
215 several other neuronal factors – involved in both neuronal identity and prototypic  
216 function – included Microtubule-Associated Protein 2 (MAP2), Tubulin Beta-3  
217 Chain (TUBB3, or  $\beta 3$ ), Synaptic Vesicle Glycoprotein 2A (SV2A), among other  
218 neuron-specific markers (see Fig. 2). In addition to these changes, we also  
219 screened our dataset against novel, yet statistically prominent, Scz GWAS factors  
220 identified in the largest population genetic dataset reported to date [33]. One  
221 important Scz GWAS factor to emerge from our analysis of down-regulated  
222 proteins in Scz organoids was Pleiotrophin (PTN). In our prior work [1], we also  
223 detected the differential expression of PTN at both the protein and RNA level in  
224 Scz organoids, including in both Scz progenitors and neurons. This better powered  
225 analysis therefore replicates this previous finding, and further establishes PTN as a  
226 potentially important Scz risk factor during early brain assembly.

227 Similar to our review of down-regulated proteins, we also identified a  
228 number of biologically interesting observations in our up-regulated Scz protein set  
229 list (see Table 2). This included up-regulation of numerous fibrinogens (FGG, FGB,  
230 FGA; Log2FC = 0.749-0.768,  $p = 0.008$ -0.010) and apolipoproteins (APOM,  
231 APOA1, APOE, APOC3, APOB; Log2FC = 0.562-0.771,  $p = 0.001$ -0.015).  
232 However, one of the most notable up-regulated protein was another Scz GWAS  
233 factor [33] that (like PTN) we had also previously identified in our prior Scz patient-  
234 derived organoid work [1]; namely, Podocalyxin (PODXL; Log2FC = 0.939,  $p <$   
235 0.001). Therefore, similar to our replication of down-regulated PTN expression in  
236 Scz organoids, this analysis in a larger pool of patients confirms that PODXL is  
237 another high-confidence candidate that may play a role in modulating Scz risk  
238 during early brain development.

239 We next sought to understand the potential functionality of our differentially  
240 expressed protein targets by parsing these factors into pathways, which may also  
241 unveil broader changes in regulatory networks underscoring disease-related  
242 phenotypes. We principally examined Gene Ontology (GO) pathways, parsed by  
243 annotations belonging to biological (Tables 3-4) and molecular (Tables 5-6)  
244 function of differentially expressed proteins. We first considered down-regulated  
245 GO biological pathways. Down-regulated GO biological pathways essential for

246 normative brain assembly, development, and maturation overwhelmingly defined  
247 Scz patient-derived organoids. This included down-regulated expression of factors  
248 that map to axonogenesis, axon development, axon guidance, morphogenesis  
249 pathways regulating neuronal differentiation, and, broadly speaking, central  
250 nervous system development (due the sheer number of pathways involved here,  
251 please refer to Table 3 for statistical values). Another interesting down-regulated  
252 GO biological process pathway in Scz organoids was specific enrichment for  
253 factors regulating substantia nigra development (GO:0021762, adjusted  $p =$   
254 0.0182, Neg Log<sub>10</sub> = 1.74), which is of interest given that this midbrain region  
255 belongs to the basal ganglia which holds broad relevance to Scz neuropathology  
256 and its treatment (e.g. dopamine and monoamine hypotheses of Scz development  
257 and symptoms). Contrary to down-regulated GO biological pathways, up-regulated  
258 pathways in Scz organoids broadly reflected pathways involved in cellular  
259 metabolism, chylomicron assembly and remodeling, sterol and steroid pathways,  
260 as well as lipoprotein remodeling and metabolism-related pathways (refer to Table  
261 4 for statistical values).

262 Broadly speaking, these changes were also reflected in our analysis of GO  
263 pathways annotated for molecular functionality. Specifically, down-regulated GO  
264 molecular functions in Scz organoids comprised cytoskeletal structural, binding,  
265 and activity, as well as metabolic pathways relevant to neurodevelopment such  
266 GTP binding and GTPase activity (see Table 5; also identified in our prior prenatal  
267 drug modeling organoid work [11]). Similarly, up-regulated GO molecular function  
268 pathways in Scz organoids were typically related to sterol activity, cell adhesion,  
269 and lipoprotein binding/transfer/activity (see Table 6). In sum, these data provide  
270 additional veracity to the idea that there are metabolic functions underscoring the  
271 depletion of neuronal development factors in Scz organoids.

272 Lastly, we also considered whether Reactome pathways might unveil other  
273 novel biology in Scz organoids. Overall, an analysis of down-regulated (Table 7)  
274 and up-regulated (Table 8) Reactome pathways in Scz organoids revealed broadly  
275 similar pathway enrichment to those identified via GO analysis, with some notable  
276 exceptions. First, in our down-regulated Reactome pathway analysis, we noted  
277 that there were numerous significant pathways involved in NMDA receptor  
278 activation and assembly, ER to Golgi transport, as well as synaptic transmission  
279 (see Table 7 for a comprehensive list and statistical values). Contrary to this, and  
280 in addition to a convergent detection of lipoprotein-related metabolism pathways,  
281 unique Reactome pathways that were up-regulated in Scz organoids comprised  
282 post-translational protein phosphorylation, pathways related to MAPK signaling,  
283 IGF-related pathways. Overall, these data suggest that ying-and-yang alterations  
284 in Scz organoids exist, whereby the disruption of neuronal-development factors  
285 and pathways yields enrichment for pathways presumably involved in either

286 compensation or other disease-related neuropathology including phenotypes that  
287 have possibly not yet articulated in human-derived tissue (e.g. metabolic changes).

288

## 289 **DISCUSSION**

290 The aim of the current study was to further our knowledge of Scz by  
291 providing a deep, unbiased, analysis of molecular factors regulating central  
292 nervous system development in human-derived 3D tissue. To circumvent ethical  
293 and technical limitations in being able to access developing neural tissue from Scz  
294 patients [11], we generated 3D iPSC-derived cerebral organoids from  $n = 25$   
295 human donors ( $n = 8$  Ctrl donors and  $n = 17$  Scz donors). This approach allowed  
296 us to generate a theoretically limitless supply of self-regulating 3D neural tissue  
297 that recapitulated hallmark features of early brain assembly and corticogenesis [34,  
298 35]. Samples were correspondingly subjected to cutting-edge isobaric barcoding  
299 chemistry that allowed up to 15 human donor samples (+ 1 pool for normalization)  
300 to be condensed into a single tube that could then be deconstructed via high-  
301 sensitivity, online, nano liquid-chromatography/mass-spectrometry proteomics.  
302 This allowed us to generate a posttranslational molecular map of factors in Scz  
303 patient-derived tissue/organoid samples. Consequently, we were able to identify  
304 that Scz organoids principally differed from healthy Ctrl due to differences in the  
305 total quantity of molecular factors (rather than their diversity), the expression of an  
306 ensemble of neuronal factors, and the differential regulation of specific GWAS-  
307 implicated [33] disease candidates (namely, PTN and PODXL).

308

### 309 **Convergence upon Depletion of Neuronal Factors in Scz Organoids**

310 The first phenotype to arise in our molecular mapping of Scz organoids was  
311 the extent to which canonical neuron identity and development factors were  
312 depleted in Scz patient-derived organoids. For several decades, numerous  
313 theories have emerged which link neuronal and synaptic function with Scz [36-38],  
314 particularly as it relates to cortical dysfunction [39-41] and the cognitive symptoms  
315 [42, 43] observed in clinical cases [44]. Recently, progress has been made in  
316 understanding early-arising changes within the developing brain that may  
317 influence novel neurodevelopmental factors with putative links to Scz [45]. This has  
318 led to numerous investigations of early-arising biological phenomenon in various  
319 model systems. Human-derived models, usually leveraging the power of gene  
320 edited or patient-derived iPSCs, have consequently revealed alterations in  
321 neuronal differentiation [46], mitochondrial metabolic function [47, 48],  
322 catecholamine levels [49], neuron-glia interactions [50], synaptogenesis [51], and  
323 synaptic function [52]. Thus, patient-derived iPSCs have proven to be a powerful  
324 tool in tracing early neurodevelopmental features of Scz [53], which can be further  
325 exploited if used to generate human-derived organoids which recapitulate  
326 endogenous self-regulatory mechanisms associated with cortical patterning and



327 development within a 3D macroenvironment [11]. Building upon prior Scz organoid  
328 work [1, 27, 29, 54], here we report lower levels of an ensemble of neuron-related  
329 development factors comprising GAP43, CRABP1, NCAM1, and MYEF2 as well as  
330 identity factors comprising MAP2, TUBB3, and SV2A. Broadly speaking, these  
331 molecular findings are consistent with our prior work which reported disrupted  
332 neurogenesis and lower total neuron numbers within Scz cerebral organoids [1, 55,  
333 56] – a phenotype which has also been independently reported by other groups  
334 [28]. Thus, fewer neurons will result in less MAP, TUBB3, and SV2A expression,  
335 which is consistent with the molecular outcomes of this independent investigation.  
336 Our detection of lower NCAM1 protein levels in Scz organoids is also consistent  
337 with a prior report that reported decreased NCAM1 expression in Scz neural  
338 progenitor cells [57]. Alterations in the growth-associated factor GAP43 have also  
339 been observed across multiple brain regions and independent studies that have  
340 evaluated postmortem Scz patient tissue [58-62]. When combined, these data  
341 support the idea, and data previously reported in the organoid literature [1, 28], that  
342 a depletion in factors supporting neuronal development yields an upstream  
343 depletion of neurons within Scz patient-derived organoids [1, 28].

344

#### 345 **Regulation of Novel GWAS Factors (PTN & PODXL) in Scz Organoids**

346 The other major phenotype identified in our molecular mapping of Scz  
347 cerebral organoids was the differential expression of two novel GWAS factors,  
348 namely PTN and PODXL. This analysis comprised us cross-referencing the  
349 highest-confidence GWAS factors identified in unbiased clinical samples (see [33])  
350 with our complete list of differentially expressed proteins. In our prior report utilizing  
351 a smaller 2x2 TMT-LC/MS cohort design [1], we identified the differential  
352 expression of four GWAS candidates in Scz cerebral organoids at the protein level  
353 (PTN, COMT, PLCL1, and PODXL). Of these candidates, we were able to detect  
354 and replicate the differential expression of two of these factors in our much larger  
355 sample of  $n = 25$  reported here. This specifically comprised alterations in PTN  
356 (down-regulated) and PODXL (up-regulated). These factors represent high-  
357 confidence GWAS factors associated with Scz, but otherwise have relatively  
358 unknown disease relevance. PTN has also been reported to be depleted in neural  
359 progenitors and shown to regulate both neurogenesis and survival phenotypes in  
360 Scz cerebral organoids [1], providing the first functional molecular data related to  
361 this candidate within the Scz literature. Other groups have also recently identified  
362 that PTN secreted from neural stem cells supports the maturation of new-born  
363 neurons [63], and can function as a neurotrophic growth factor *in vivo* to modulate  
364 neuronal loss [64] and long-term potentiation induction [65]. PTN has also since  
365 been implicated in a novel amphetamine-model of relevance to Scz [66], a recent  
366 computational protein-network analysis underlying Scz [67], as well as at least one  
367 nascent Scz gene-association study ( $n = 1,823$  humans) [68]. On the other hand,

368 little work has been completed on the role of PODXL in Scz, probably because  
369 PODXL is a renal-enriched factor most often associated with kidney podocytes and  
370 mesothelial cells [69]. Of note, PODXL has recently been shown to play a role in  
371 neurite outgrowth, branching, axonal fasciculation, and synapse number [70],  
372 supporting a potential role for this factor in synaptic plasticity. Additionally, PODXL  
373 was recently shown to be an apical determinant that may alter lumen size of neural  
374 progenitor cell rosettes during morphogenesis [71]. Thus, PODXL may be a fruitful  
375 target for future investigations seeking to deconvolute the role of novel Scz GWAS  
376 factors within the developing brain.

377

### 378 **Other Novel Differentially Expressed Candidates in Scz Organoids**

379 Lastly, it is worth emphasizing several other differentially expressed  
380 molecular candidates observed in Scz cerebral organoids hold biological interest.  
381 First and foremost, we identified that Carboxypeptidase E (CPE) was  
382 downregulated in Scz cerebral organoids. CPE is a prohormone-processing  
383 enzyme [72] and regulated secretory pathway receptor [73], possibly best known  
384 for regulating the sorting and activity-dependent secretion of BDNF [74, 75] as well  
385 as TrkB surface insertion [76] in neurons. However, CPE was recently suggested  
386 to also function as a growth factor independently of its enzymatic and sorting  
387 activities [77]. Indeed, amongst other reports suggesting a role in neuroprotection  
388 [78], it has recently been shown that CPE regulates cortical neuron migration and  
389 dendritic morphology [79]. However, the degree to which these effects is  
390 dependent upon its cargo, which includes other growth factors (e.g. BDNF),  
391 remains unclear. Lastly, the other notable differentially expressed candidates  
392 worthy of discussion comprised alterations within the apolipoprotein family,  
393 specifically APOM, APOA1, APOE, APOC3, and APOB. Apolipoproteins have  
394 been previously investigated as potential metabolic-related biomarkers [80] in  
395 peripherally accessible biological fluids (e.g. CSF [81] or plasma [82]). This  
396 specifically includes alterations in APOE and APOA1 in Scz patients [83]. These  
397 findings are broadly related to cholesterol [84], fatty acid [85], phospholipid  
398 metabolism [86], as well as other membrane-related [87] hypotheses of Scz (which  
399 are all somewhat related and/or derived from similar evidence pools). Nonetheless,  
400 it is interesting that evidence related to these hypotheses was detectable and  
401 reproducible across our sample of patients, and may indicate that further work on  
402 potential metabolic factors may also be a further avenue of fruitful research.

403

### 404 **Concluding Remarks**

405 In closing, we identified a broad reduction in molecules important for  
406 neuronal identity and development as well as specific alterations in novel GWAS  
407 and other disease-relevant molecules previously implicated in Scz. This work  
408 collectively supports the idea that Scz is a complex disease underscored by

409 multifaceted changes that likely yield cell-specific as well as multiple mechanisms  
410 [55]. In closing, the authors hope that the current dataset may provide insight for  
411 other researchers and labs that have an interest in biological data from human-  
412 derived 3D stem cell systems but otherwise employ other model systems.

413

#### 414 **CONTRIBUTIONS**

415 M.N. and D.C. conceived the project and designed experiments. M.N. generated  
416 all 3D tissue from human stem cells, and wrote the manuscript with input and  
417 supervision from D.C (senior author). Our technician, A.L., provided important  
418 logistical support by assisting with the generation and processing of 3D human-  
419 derived tissue. Lastly, H.F. and D.G. completed all LC/MS computational analysis  
420 presented in the manuscript, with D.G. serving as the senior author overseeing  
421 bioinformatics analyses.

422

#### 423 **ACKNOWLEDGEMENTS**

424 M.N. was the recipient of a NHMRC CJ Martin Fellowship that supported mRNA  
425 degradation and stem cell training completed at Weill Cornell Medical College of  
426 Cornell University.

427

#### 428 **CONFLICT OF INTEREST STATEMENT**

429 The authors report no conflict of interest or commercial interests related to the  
430 manuscript.

431

#### 432 **METHODS**

433

##### 434 **Induced Pluripotent Stem Cells**

435 Briefly, human stem cells were principally acquired from NIH deposits at the  
436 Rutgers University Cell and DNA Repository. The benefit of utilizing NIH deposited  
437 lines is that all biologics have been characterized for identity, pluripotency,  
438 exogenous reprogramming factor expression, genetic stability, and viability. In  
439 sum, we sampled a total of 25 different iPSC lines comprising both healthy Ctrl  
440 and idiopathic Scz patients. Cerebral organoids were generated from all donors in  
441 this study, and each iPSC line was biologically independent (representing a unique  
442 human donor). Ctrl iPSC lines utilized for cellular experiments included  
443 MH0159019, MH0159020, MH0159021, MH0159022, MH0167170, MH0174677,  
444 and MH0174686. One Ctrl line (GM23279) was sourced from the Coriell Institute  
445 for Medical Research. Scz iPSC lines included MH0159025, MH0159026,  
446 MH0185223, MH0185225, MH0200865, MH0217268, MH0185900, MH0185954,  
447 MH0185958, MH0185963, MH0185970, MH0185912, MH0185945, MH0185964,  
448 MH0185966, MH0185925, and MH0185928. Clinical information for Scz patients is

449 available in Table S1 of our prior publication [1]. All Scz samples were derived from  
450 idiopathic cases, which we define here as schizophrenia cases that maintained  
451 unknown disease origins and do not meet a genetic/syndrome-based diagnosis (as  
452 listed in NIH/NIMH notes). Ctrl iPSC lines were screened for both personal, and  
453 family history, of major mental illnesses. All iPSC lines were maintained on  
454 Vitronectin-coated plates and fed with Essential 8 (E8) + E8 supplement media  
455 (ThermoFisher, CAT#: A1517001).

456

### 457 **3D Cerebral Organoid Tissue Generation**

458 We adapted the same undirected-differentiation organoid system that we used in  
459 our previous, more extensive, analysis of Scz neurodevelopmental mechanisms  
460 [1], which had been previously published by Lancaster et al. in *Nature*  
461 [17] and *Nature Protocols* [88]. Briefly, 2D iPSC colonies were dissociated and  
462 cultured into 3D embryoid bodies in ultra-low attachment plates (Corning; CAT#:  
463 3474). Rock inhibitor (1:1000; Stem Cell Tech, CAT#: 72304) and basic fibroblast  
464 growth factor (Pepro Tech, CAT#: 100-18B) are included in media for the first 2-4  
465 days of embryoid body culturing to promote stem cell aggregation and survival.  
466 Following this, healthy embryoid bodies are isolated and transferred to Nunclon  
467 Sphera 24 well plates (Thermo Scientific, CAT#: 174930) for neural fate  
468 specification, using neural induction media. Successful early 'organoids' were  
469 embedded in a 30µl Matrigel (Corning, CAT#: 354234) spheroid-droplet and  
470 polymerized at 37°C for 20-30min which provided a matrix for subsequent neural  
471 expansion. Organoids suspended in matrigel droplets were next cultured in  
472 terminal organoid media for 4-6 days without agitation, and then cultured with  
473 agitation at 60-70RPM until harvested for experiments. For further organoid  
474 protocol detail, including QC steps, please refer to our previous publication [1].  
475 Likewise, for further insight into organoid handling for proteomic analysis, please  
476 refer to our other organoid manuscript [11].

477

### 478 **Proteomics Sample Preparation, TMT Labeling, & Liquid- 479 Chromatography/Mass-Spectrometry**

480 Isobaric stable isotope labeling was achieved via Tandem Mass Tag pro (TMTpro)  
481 chemistry and Liquid-Chromatography/Mass-Spectrometry (LC/MS) proteomics as  
482 previously described [1, 11, 66]. Briefly, intact organoids were reduced with  
483 dithiothreitol and underwent alkylation with iodoacetamide before tryptic digestion at  
484 37°C overnight. For barcoding chemistry, we employed TMTpro 16-plex labeling  
485 according to the manufacturer's instructions (Thermo Fisher Scientific, CAT#  
486 A44521). Each multi-plex experiment contained relevant organoid samples with an  
487 additional pooled isobaric reference label made up of the same peptide digest from  
488 the pooled mix of organoids (for data normalization between runs; TMT Tag 134N  
489 for both TMT-LC/MS runs). A list of sample labeling strategies and replicates is

490 available in the PRIDE proteomics exchange repository. TMT-labelled peptides  
491 were desalted using C18' stage-tips prior to LC-MS analysis. An EASY-nLC 1200,  
492 which was coupled to a Fusion Lumos mass spectrometer, (Thermo Fisher  
493 Scientific) was utilized in positive, data-dependent acquisition mode, with samples  
494 analysed in technical duplicate. Buffer A (0.1% FA in water) and buffer B (0.1% FA  
495 in 80% ACN) were used as mobile phases for gradient separation. TMT-labeled  
496 peptides were analyzed on a 75  $\mu\text{m}$  I.D. column (ReproSil-Pur C18-AQ, 3 $\mu\text{m}$ , Dr.  
497 Maisch GmbH, German) was packed in-house. A separation gradient of 5–10%  
498 buffer B over 1min, 10%-35% buffer B over 229min, and 35%-100% B over 5min at  
499 a flow rate of 300 nL/min was adapted. An Orbitrap mass analyzer acquired Full  
500 MS scans over a range of 350-1500 m/z with resolution 120,000 at m/z 200. The  
501 top 20 most-abundant precursors were selected with an isolation window of 0.7  
502 Thomsons and fragmented by high-energy collisional dissociation with normalized  
503 collision energy of 40. The Orbitrap mass analyzer was also used to acquire  
504 MS/MS scans. The automatic gain control target value was 1e6 for full scans and  
505 5e4 for MS/MS scans respectively, and the maximum ion injection time was 54ms  
506 for both.

507

#### 508 **Data Processing and Bioinformatics Pipeline for Quantitative Analysis**

509 Mass spectra were pre-processed as described [1, 11, 66] and processed using  
510 MaxQuant [89] (1.5.5.1). Spectra were searched against the full set of human  
511 protein sequences annotated in UniProt (sequence database Sep-2017) using  
512 Andromeda. Data was searched as described [1, 11] as a separate and single  
513 (combined) batches, with fixed modification, cysteine carbamidomethylation and  
514 variable modifications, N-acetylation and methionine oxidation. Searches were  
515 performed using a 20 ppm precursor ion tolerance for total protein level analysis.  
516 Further modifications included TMT tags on peptide N termini/lysine residues  
517 (+229.16293 Da) set as static modifications. Data was processed using trypsin/P  
518 as the proteolytic enzyme with up to 2 missed cleavage sites allowed. Peptides  
519 less than seven amino acids were not considered for further analysis because of  
520 lack of uniqueness, and a 1% False-Discovery Rate (FDR) was used to filter at  
521 peptide and protein levels. Protein identification required at least two unique or  
522 razor peptides per protein group. Contaminants, and reverse identification were  
523 excluded from further data analysis. Quantification was performed with the reporter  
524 ion quantification normalization in MaxQuant. Protein intensities were log<sub>2</sub>  
525 transformed using Perseus [90] (1.x.10). The violin plots of log<sub>2</sub> transformed  
526 protein intensity distribution and the boxplot of coefficient of variations per sample  
527 group were visualized using R package ggplot2. Proteins quantified in at least 70%  
528 of samples in at least one sample group were subjected to downstream  
529 visualization (principal component analysis, volcano plot) and statistical analysis

530 using Perseus. For principal component analysis, missing values were imputed  
531 from normal distribution (downshift 1.8, width 0.3) using Perseus. For differential  
532 expression analysis proteins were subjected to Welch's t-test; p-value < 0.05 and  
533  $|\log_2FC| > 0.5$  visualized in volcano plot and subjected to downstream functional  
534 enrichment analysis using g:Profiler, including Gene Ontology, KEGG and  
535 Reactome databases (as described, [91, 92]).

536

### 537 **Data Availability Statement**

538 The MS proteomics raw data and MaxQuant search parameters have been  
539 deposited to the ProteomeXchange Consortium  
540 (<http://www.proteomexchange.org/>) via the PRIDE partner repository [93]  
541 with the data set identifier PXD027812.

542

### 543 **REFERENCES**

544

- 545 1. Notaras, M., et al., *Schizophrenia is defined by cell-specific neuropathology and*  
546 *multiple neurodevelopmental mechanisms in patient-derived cerebral organoids.*  
547 *Mol Psychiatry*, 2021.
- 548 2. Klosterkötter, J., et al., *Diagnosing schizophrenia in the initial prodromal phase.*  
549 *Arch Gen Psychiatry*, 2001. **58**(2): p. 158-164.
- 550 3. Cornblatt, B.A., et al., *The schizophrenia prodrome revisited: a*  
551 *neurodevelopmental perspective.* *Schizophr Bull*, 2003. **29**(4): p. 633-651.
- 552 4. Brown, A.S. and E.S. Susser, *In utero infection and adult schizophrenia.* *Mental*  
553 *retardation and developmental disabilities research reviews*, 2002. **8**(1): p. 51-57.
- 554 5. Kunugi, H., et al., *Schizophrenia following in utero exposure to the 1957 influenza*  
555 *epidemics in Japan.* *Am J Psychiatry*, 1995.
- 556 6. Takei, N., et al., *Relationship between in utero exposure to influenza epidemics and*  
557 *risk of schizophrenia in Denmark.* *Biol Psychiatry*, 1996. **40**(9): p. 817-824.
- 558 7. Procopio, M., R.J. Davies, and P. Marriott, *The hormonal environment in utero as a*  
559 *potential aetiological agent for schizophrenia.* *Eur Arch Psychiatr Clin Neurosci*,  
560 2006. **256**(2): p. 77-81.
- 561 8. McClellan, J.M., E. Susser, and M.-C. King, *Maternal famine, de novo mutations,*  
562 *and schizophrenia.* *JAMA*, 2006. **296**(5): p. 582-584.
- 563 9. Boks, M., et al., *Genetic vulnerability to DUSP22 promoter hypermethylation is*  
564 *involved in the relation between in utero famine exposure and schizophrenia.* *NPJ*  
565 *Schizophr*, 2018. **4**(1): p. 1-8.
- 566 10. Hyman, S.E., *The daunting polygenicity of mental illness: making a new map.*  
567 *Philosophical Transactions of the Royal Society B: Biological Sciences*, 2018.  
568 **373**(1742): p. 20170031.
- 569 11. Notaras, M., et al., *Neurodevelopmental signatures of narcotic and*  
570 *neuropsychiatric risk factors in 3D human-derived forebrain organoids.* *Molecular*  
571 *Psychiatry*, 2021: p. 1-24.
- 572 12. Luo, C., et al., *Cerebral organoids recapitulate epigenomic signatures of the human*  
573 *fetal brain.* *Cell Rep*, 2016. **17**(12): p. 3369-3384.

- 574 13. Jourdon, A., et al., *PsychENCODE and beyond: transcriptomics and epigenomics*  
575 *of brain development and organoids*. *Neuropsychopharmacol*, 2021. **46**(1): p. 70-  
576 85.
- 577 14. Camp, J.G., et al., *Human cerebral organoids recapitulate gene expression*  
578 *programs of fetal neocortex development*. *Proc Natl Acad Sci U S A*, 2015.  
579 **112**(51): p. 15672-15677.
- 580 15. Klaus, J., et al., *Altered neuronal migratory trajectories in human cerebral*  
581 *organoids derived from individuals with neuronal heterotopia*. *Nat Med*, 2019.  
582 **25**(4): p. 561-568.
- 583 16. Pollen, A.A., et al., *Establishing cerebral organoids as models of human-specific*  
584 *brain evolution*. *Cell*, 2019. **176**(4): p. 743-756. e17.
- 585 17. Lancaster, M.A., et al., *Cerebral organoids model human brain development and*  
586 *microcephaly*. *Nature*, 2013. **501**(7467): p. 373-379.
- 587 18. Zhang, W., et al., *Cerebral organoid and mouse models reveal a RAB39b–PI3K–*  
588 *mTOR pathway-dependent dysregulation of cortical development leading to*  
589 *macrocephaly/autism phenotypes*. *Genes & Dev*, 2020. **34**(7-8): p. 580-597.
- 590 19. Dang, J., et al., *Zika virus depletes neural progenitors in human cerebral organoids*  
591 *through activation of the innate immune receptor TLR3*. *Cell stem cell*, 2016. **19**(2):  
592 p. 258-265.
- 593 20. Garcez, P.P., et al., *Zika virus impairs growth in human neurospheres and brain*  
594 *organoids*. *Science*, 2016. **352**(6287): p. 816-818.
- 595 21. Ilieva, M., et al., *Psychiatry in a dish: stem cells and brain organoids modeling*  
596 *autism spectrum disorders*. *Biol Psychiatry*, 2018. **83**(7): p. 558-568.
- 597 22. Mariani, J., et al., *FOXG1-dependent dysregulation of GABA/glutamate neuron*  
598 *differentiation in autism spectrum disorders*. *Cell*, 2015. **162**(2): p. 375-390.
- 599 23. Paulsen, B., et al., *Human brain organoids reveal accelerated development of*  
600 *cortical neuron classes as a shared feature of autism risk genes*. *bioRxiv*, 2020.
- 601 24. Wegscheid, M.L., et al., *Patient-derived iPSC-cerebral organoid modeling of the*  
602 *17q11. 2 microdeletion syndrome establishes CRLF3 as a critical regulator of*  
603 *neurogenesis*. *Cell Rep*, 2021. **36**(1): p. 109315.
- 604 25. Khan, T.A., et al., *Neuronal defects in a human cellular model of 22q11. 2 deletion*  
605 *syndrome*. *Nat Med*, 2020. **26**(12): p. 1888-1898.
- 606 26. Daviaud, N., et al., *Distinct vulnerability and resilience of human neuroprogenitor*  
607 *subtypes in cerebral organoid model of prenatal hypoxic injury*. *Front Cell*  
608 *Neurosci*, 2019. **13**: p. 336.
- 609 27. Kathuria, A., et al., *Transcriptomic Landscape and Functional Characterization of*  
610 *Induced Pluripotent Stem Cell–Derived Cerebral Organoids in Schizophrenia*.  
611 *JAMA Psychiatry*, 2020. **77**(7): p. 745-754.
- 612 28. Stachowiak, E., et al., *Cerebral organoids reveal early cortical maldevelopment in*  
613 *schizophrenia—computational anatomy and genomics, role of FGFR1*. *Transl*  
614 *Psychiatry*, 2017. **7**(11): p. 1-24.
- 615 29. Benson, C.A., et al., *Immune factor, TNF $\alpha$ , disrupts human brain organoid*  
616 *development similar to schizophrenia—schizophrenia increases developmental*  
617 *vulnerability to TNF $\alpha$* . *Front Cell Neurosci*, 2020. **14**: p. 233.

- 618 30. Sawada, T., et al., *Developmental excitation-inhibition imbalance underlying*  
619 *psychoses revealed by single-cell analyses of discordant twins-derived cerebral*  
620 *organoids*. Mol Psychiatry, 2020. **25**(11): p. 2695-2711.
- 621 31. Srikanth, P., et al., *Shared effects of DISC1 disruption and elevated WNT signaling*  
622 *in human cerebral organoids*. Transl Psychiatry, 2018. **8**(1): p. 1-14.
- 623 32. Ye, F., et al., *DISC1 regulates neurogenesis via modulating kinetochore attachment*  
624 *of Ndel1/Nde1 during mitosis*. Neuron, 2017. **96**(5): p. 1041-1054. e5.
- 625 33. Ripke, S., et al., *Biological insights from 108 schizophrenia-associated genetic loci*.  
626 Nature, 2014. **511**(7510): p. 421.
- 627 34. Mason, J.O. and D.J. Price, *Building brains in a dish: prospects for growing*  
628 *cerebral organoids from stem cells*. Neurosci, 2016. **334**: p. 105-118.
- 629 35. Shi, Y., Q. Wu, and X. Wang, *Modeling brain development and diseases with*  
630 *human cerebral organoids*. Curr Op Neurobiol, 2021. **66**: p. 103-115.
- 631 36. Mehta, U.M., et al., *Mirror neuron dysfunction in schizophrenia and its functional*  
632 *implications: a systematic review*. Schizophr Res, 2014. **160**(1-3): p. 9-19.
- 633 37. Freedman, R., et al., *Elementary neuronal dysfunctions in schizophrenia*. Schizophr  
634 Res, 1991. **4**(2): p. 233-243.
- 635 38. Olney, J.W. and N.B. Farber, *Glutamate receptor dysfunction and schizophrenia*.  
636 Arch Gen Psychiatry, 1995. **52**(12): p. 998-1007.
- 637 39. Gonzalez-Burgos, G. and D.A. Lewis, *GABA neurons and the mechanisms of*  
638 *network oscillations: implications for understanding cortical dysfunction in*  
639 *schizophrenia*. Schizophr Bull, 2008. **34**(5): p. 944-961.
- 640 40. Lewis, D.A., *GABAergic local circuit neurons and prefrontal cortical dysfunction*  
641 *in schizophrenia*. Brain Res Revs, 2000. **31**(2-3): p. 270-276.
- 642 41. Curley, A.A. and D.A. Lewis, *Cortical basket cell dysfunction in schizophrenia*. J  
643 Physiol, 2012. **590**(4): p. 715-724.
- 644 42. Lewis, D.A., *Inhibitory neurons in human cortical circuits: substrate for cognitive*  
645 *dysfunction in schizophrenia*. Curr Op Neurobiol, 2014. **26**: p. 22-26.
- 646 43. Mukherjee, A., et al., *Long-lasting rescue of network and cognitive dysfunction in a*  
647 *genetic schizophrenia model*. Cell, 2019. **178**(6): p. 1387-1402. e14.
- 648 44. Gonzalez-Burgos, G., K.N. Fish, and D.A. Lewis, *GABA neuron alterations,*  
649 *cortical circuit dysfunction and cognitive deficits in schizophrenia*. Neural  
650 plasticity, 2011. **2011**.
- 651 45. Nakamura, J.P., et al., *The maternal immune activation model uncovers a role for*  
652 *the Arx gene in GABAergic dysfunction in schizophrenia*. Brain Behav Immun,  
653 2019. **81**: p. 161-171.
- 654 46. Robicsek, O., et al., *Abnormal neuronal differentiation and mitochondrial*  
655 *dysfunction in hair follicle-derived induced pluripotent stem cells of schizophrenia*  
656 *patients*. Mol Psychiatry, 2013. **18**(10): p. 1067-1076.
- 657 47. Ni, P., et al., *iPSC-derived homogeneous populations of developing schizophrenia*  
658 *cortical interneurons have compromised mitochondrial function*. Mol Psychiatry,  
659 2020. **25**(11): p. 2873-2888.
- 660 48. Li, J., et al., *Mitochondrial deficits in human iPSC-derived neurons from patients*  
661 *with 22q11.2 deletion syndrome and schizophrenia*. Transl Psychiatry, 2019. **9**(1):  
662 p. 1-10.



- 663 49. Hook, V., et al., *Human iPSC neurons display activity-dependent neurotransmitter*  
664 *secretion: aberrant catecholamine levels in schizophrenia neurons*. Stem Cell Rep,  
665 2014. **3**(4): p. 531-538.
- 666 50. Windrem, M.S., et al., *Human iPSC glial mouse chimeras reveal glial contributions*  
667 *to schizophrenia*. Cell Stem Cell, 2017. **21**(2): p. 195-208. e6.
- 668 51. Habela, C.W., H. Song, and G.-l. Ming, *Modeling synaptogenesis in schizophrenia*  
669 *and autism using human iPSC derived neurons*. Mol Cell Neurosci, 2016. **73**: p. 52-  
670 62.
- 671 52. Kathuria, A., et al., *Synaptic deficits in iPSC-derived cortical interneurons in*  
672 *schizophrenia are mediated by NLGN2 and rescued by N-acetylcysteine*. Transl  
673 Psychiatry, 2019. **9**(1): p. 1-13.
- 674 53. Ahmad, R., et al., *Tracing early neurodevelopment in schizophrenia with induced*  
675 *pluripotent stem cells*. Cells, 2018. **7**(9): p. 140.
- 676 54. Stachowiak, E., et al., *Cerebral organoids reveal early cortical maldevelopment in*  
677 *schizophrenia—computational anatomy and genomics, role of FGFR1*.  
678 Translational psychiatry, 2017. **7**(11): p. 1-24.
- 679 55. Notaras, M., et al., *Multiple neurodevelopmental mechanisms of schizophrenia in*  
680 *patient-derived cerebral organoids*. Biol Psychiatry, 2021. **89**(9): p. S100.
- 681 56. Notaras, M., et al., *BRN2 and PTN unveil multiple neurodevelopmental mechanisms*  
682 *in Schizophrenia patient-derived cerebral organoids*. bioRxiv, 2021.
- 683 57. Brennand, K., et al., *Phenotypic differences in hiPSC NPCs derived from patients*  
684 *with schizophrenia*. Mol Psychiatry, 2015. **20**(3): p. 361-368.
- 685 58. Eastwood, S.L. and P.J. Harrison, *Synaptic pathology in the anterior cingulate*  
686 *cortex in schizophrenia and mood disorders. A review and a Western blot study of*  
687 *synaptophysin, GAP-43 and the complexins*. Brain Res Bull, 2001. **55**(5): p. 569-  
688 578.
- 689 59. Perrone-Bizzozero, N.I., et al., *Levels of the growth-associated protein GAP-43 are*  
690 *selectively increased in association cortices in schizophrenia*. Proc Natl Acad Sci U  
691 S A, 1996. **93**(24): p. 14182-14187.
- 692 60. Sower, A.C., E.D. Bird, and N.I. Perrone-Bizzozero, *Increased levels of GAP-43*  
693 *protein in schizophrenic brain tissues demonstrated by a novel immunodetection*  
694 *method*. Mol Cell Neuropathol, 1995. **24**(1): p. 1-11.
- 695 61. Chambers, J.S., et al., *Growth-associated protein 43 (GAP-43) and synaptophysin*  
696 *alterations in the dentate gyrus of patients with schizophrenia*. Prog Neuropsychopharmacol, 2005. **29**(2): p. 283-290.
- 697 62. Weickert, C.S., et al., *Reduced GAP-43 mRNA in dorsolateral prefrontal cortex of*  
698 *patients with schizophrenia*. Cereb Cortex, 2001. **11**(2): p. 136-147.
- 700 63. Tang, C., et al., *Neural stem cells behave as a functional niche for the maturation of*  
701 *newborn neurons through the secretion of PTN*. Neuron, 2019. **101**(1): p. 32-44. e6.
- 702 64. Nikolakopoulou, A.M., et al., *Pericyte loss leads to circulatory failure and*  
703 *pleiotrophin depletion causing neuron loss*. Nat Neurosci, 2019. **22**(7): p. 1089-  
704 1098.
- 705 65. Pavlov, I., et al., *Role of heparin-binding growth-associated molecule (HB-GAM) in*  
706 *hippocampal LTP and spatial learning revealed by studies on overexpressing and*  
707 *knockout mice*. Mol Cell Neurosci, 2002. **20**(2): p. 330-342.

- 708 66. Greening, D.W., et al., *Chronic methamphetamine interacts with BDNF Val66Met*  
709 *to remodel psychosis pathways in the mesocorticolimbic proteome*. Mol Psychiatry,  
710 2019: p. 1-17.
- 711 67. Chang, X., et al., *Common and rare genetic risk factors converge in protein*  
712 *interaction networks underlying schizophrenia*. Front Genet, 2018. **9**: p. 434.
- 713 68. Lv, Y., et al., *Positive association between PTN polymorphisms and schizophrenia*  
714 *in Northeast Chinese Han population*. Psychiatric Genetics, 2020. **30**(5): p. 141-  
715 149.
- 716 69. Kang, H.G., et al., *Loss of podocalyxin causes a novel syndromic type of congenital*  
717 *nephrotic syndrome*. Exp Mol Med, 2017. **49**(12): p. e414-e414.
- 718 70. Vitureira, N., et al., *Podocalyxin is a novel polysialylated neural adhesion protein*  
719 *with multiple roles in neural development and synapse formation*. PloS One, 2010.  
720 **5**(8): p. e12003.
- 721 71. Townshend, R.F., et al., *Effect of cell spreading on rosette formation by human*  
722 *pluripotent stem cell-derived neural progenitor cells*. Front Cell Dev Biol, 2020. **8**:  
723 p. 1072.
- 724 72. Hook, V.Y., L.E. Eiden, and M.J. Brownstein, *A carboxypeptidase processing*  
725 *enzyme for enkephalin precursors*. Nature, 1982. **295**(5847): p. 341-342.
- 726 73. Cool, D.R., et al., *Carboxypeptidase E is a regulated secretory pathway sorting*  
727 *receptor: genetic obliteration leads to endocrine disorders in Cpefat mice*. Cell,  
728 1997. **88**(1): p. 73-83.
- 729 74. Lou, H., et al., *Sorting and activity-dependent secretion of BDNF require*  
730 *interaction of a specific motif with the sorting receptor carboxypeptidase e*. Neuron,  
731 2005. **45**(2): p. 245-255.
- 732 75. Notaras, M. and M. van den Buuse, *Brain-derived neurotrophic factor (BDNF):*  
733 *novel insights into regulation and genetic variation*. The Neuroscientist, 2019.  
734 **25**(5): p. 434-454.
- 735 76. Li, N., et al., *Carboxypeptidase E regulates Activity-dependent TrkB Neuronal*  
736 *surface Insertion and Hippocampal memory*. J Neurosci, 2021.
- 737 77. Cheng, Y., N.X. Cawley, and Y.P. Loh, *Carboxypeptidase E (NF- $\alpha$ 1): a new*  
738 *trophic factor in neuroprotection*. Neurosci Bull, 2014. **30**(4): p. 692-696.
- 739 78. Cong, L., et al., *A novel single nucleotide T980C polymorphism in the human*  
740 *carboxypeptidase E gene results in loss of neuroprotective function*. PLoS One,  
741 2017. **12**(1): p. e0170169.
- 742 79. Liang, C., et al., *Cortical neuron migration and dendrite morphology are regulated*  
743 *by carboxypeptidase E*. Cereb Cortex, 2019. **29**(7): p. 2890-2903.
- 744 80. Xuan, J., et al., *Metabolomic profiling to identify potential serum biomarkers for*  
745 *schizophrenia and risperidone action*. J Proteome Res, 2011. **10**(12): p. 5433-5443.
- 746 81. Huang, J.T., et al., *Independent protein-profiling studies show a decrease in*  
747 *apolipoprotein A1 levels in schizophrenia CSF, brain and peripheral tissues*. Mol  
748 Psychiatry, 2008. **13**(12): p. 1118-1128.
- 749 82. Dean, B., et al., *Plasma apolipoprotein E is decreased in schizophrenia spectrum*  
750 *and bipolar disorder*. Psychiatr Res, 2008. **158**(1): p. 75-78.
- 751 83. Martins-De-Souza, D., et al., *Different apolipoprotein E, apolipoprotein A1 and*  
752 *prostaglandin-H2 D-isomerase levels in cerebrospinal fluid of schizophrenia*  
753 *patients and healthy controls*. World J Biol Psychiatry, 2010. **11**(5): p. 719-728.

- 754 84. Woods, A.G., et al., *Potential biomarkers in psychiatry: focus on the cholesterol*  
755 *system*. J Cell Mol Med, 2012. **16**(6): p. 1184-1195.
- 756 85. Fenton, W.S., J. Hibbeln, and M. Knable, *Essential fatty acids, lipid membrane*  
757 *abnormalities, and the diagnosis and treatment of schizophrenia*. Biol Psychiatry,  
758 2000. **47**(1): p. 8-21.
- 759 86. Opler, M.G. and L.A. Opler, *Abnormal phospholipid metabolism in schizophrenia:*  
760 *evidence from epidemiological findings, clinical observations, and preliminary*  
761 *clinical trials*. Front Biosci, 2001. **6**: p. e61-65.
- 762 87. Horrobin, D.F., A.I.M. Glen, and K. Vaddadi, *The membrane hypothesis of*  
763 *schizophrenia*. Schizophr Res, 1994. **13**(3): p. 195-207.
- 764 88. Lancaster, M.A. and J.A. Knoblich, *Generation of cerebral organoids from human*  
765 *pluripotent stem cells*. Nature Protocols, 2014. **9**(10): p. 2329-2340.
- 766 89. Cox, J. and M. Mann, *MaxQuant enables high peptide identification rates,*  
767 *individualized ppb-range mass accuracies and proteome-wide protein*  
768 *quantification*. Nat Biotechnol, 2008. **26**(12): p. 1367-1372.
- 769 90. Tyanova, S., et al., *The Perseus computational platform for comprehensive analysis*  
770 *of (prote) omics data*. Nat Methods, 2016. **13**(9): p. 731-740.
- 771 91. Carli, A.L., et al., *Cancer stem cell marker DCLK1 reprograms small extracellular*  
772 *vesicles toward migratory phenotype in gastric cancer cells*. Proteomics, 2021: p.  
773 2000098.
- 774 92. Kompa, A.R., et al., *Sustained subcutaneous delivery of secretome of human*  
775 *cardiac stem cells promotes cardiac repair following myocardial infarction*.  
776 Cardiovasc Res, 2021. **117**(3): p. 918-929.
- 777 93. Perez-Riverol, Y., et al., *The PRIDE database and related tools and resources in*  
778 *2019: improving support for quantification data*. Nuc Acids Res, 2019. **47**(D1): p.  
779 D442-D450.
- 780 94. Lin, Y.-L., et al., *Cellular retinoic acid-binding protein 1 modulates stem cell*  
781 *proliferation to affect learning and memory in male mice*. Endocrinol, 2017. **158**(9):  
782 p. 3004-3014.
- 783 95. Frese, C.K., et al., *Quantitative map of proteome dynamics during neuronal*  
784 *differentiation*. Cell Rep, 2017. **18**(6): p. 1527-1542.
- 785 96. Upadhyay, A., et al., *Neurocalcin delta knockout impairs adult neurogenesis*  
786 *whereas half reduction is not pathological*. Front Mol Neurosci, 2019. **12**: p. 19.  
787  
788  
789  
790  
791  
792  
793  
794  
795  
796  
797  
798  
799

800 **TABLES**

801

802

**Table 1. 54 Down-Regulated Proteins in Scz Organoids ( $< -0.5 \text{ Log}_2\text{FC}$ ,  $p < 0.05$ ).**

| Gene Name | Protein Name                                         | Uniprot ID | Log <sub>2</sub> FC | P Value |
|-----------|------------------------------------------------------|------------|---------------------|---------|
| GAP43     | Neuromodulin                                         | P17677     | -1.183              | 0.010   |
| CRABP1    | Cellular retinoic acid-binding protein 1             | P29762     | -1.018              | 0.016   |
| TUBB3     | Tubulin beta-3 chain                                 | Q13509     | -1.015              | 0.001   |
| MAP2      | Microtubule-associated protein 2                     | P11137-3   | -0.996              | 0.009   |
| BASP1     | Brain acid soluble protein 1                         | P80723     | -0.939              | 0.006   |
| INA       | Alpha-internexin                                     | Q16352     | -0.921              | 0.035   |
| FABP7     | Fatty acid-binding protein, brain                    | O15540     | -0.903              | 0.025   |
| SV2A      | Synaptic vesicle glycoprotein 2A                     | Q7L0J3-2   | -0.899              | 0.037   |
| PKM       | Pyruvate kinase PKM                                  | P14618-2   | -0.866              | 0.004   |
| NCAM1     | Neural Cell Adhesion Molecule                        | A0A087WTF6 | -0.854              | 0.014   |
| CALM3     | Calmodulin-3                                         | P0DP25     | -0.847              | 0.002   |
| TUBB2B    | Tubulin beta-2B chain                                | Q9BVA1     | -0.840              | 0.019   |
| TNNI1     | Troponin I 1                                         | G3V489     | -0.827              | 0.037   |
| ATP1A3    | Sodium/potassium-transporting ATPase subunit alpha-3 | P13637     | -0.817              | 0.042   |
| CRMP1     | Dihydropyrimidinase-related protein 1                | Q14194     | -0.789              | 0.019   |
| RUFY3     | Protein RUFY3                                        | Q7L099     | -0.774              | 0.014   |
| ATAT1     | Alpha-tubulin N-acetyltransferase 1                  | Q5SQI0-7   | -0.773              | 0.023   |
| PEA15     | Astrocytic phosphoprotein PEA-15                     | Q15121     | -0.764              | 0.030   |
| H1-0      | Histone H1.0                                         | P07305-2   | -0.760              | 0.009   |
| NCALD     | Neurocalcin-delta                                    | P61601     | -0.738              | 0.000   |
| PPM1B     | Protein phosphatase 1B                               | O75688     | -0.714              | 0.030   |
| TAGLN3    | Transgelin-3                                         | Q9UI15     | -0.705              | 0.001   |
| PTN       | Pleiotrophin                                         | P21246     | -0.700              | 0.030   |
| CRIP2     | Cysteine-rich protein 2                              | P52943     | -0.690              | 0.005   |
| RAB6B     | Ras-related protein Rab-6B                           | Q9NRW1     | -0.684              | 0.010   |
| ENO2      | Gamma-enolase                                        | P09104-2   | -0.682              | 0.027   |
| TUBB4A    | Tubulin beta-4A chain                                | P04350     | -0.676              | 0.008   |
| DPYSL5    | Dihydropyrimidinase-                                 | Q9BPU6     | -0.673              | 0.001   |

|         |                                                                                         |            |        |       |
|---------|-----------------------------------------------------------------------------------------|------------|--------|-------|
| SEPTIN3 | related protein 5<br>Neuronal-specific<br>septin-3<br>Rab GDP<br>dissociation inhibitor | Q9UH03-2   | -0.667 | 0.015 |
| GDI1    | alpha                                                                                   | P31150     | -0.659 | 0.011 |
| FHL1    | Four and a half LIM<br>domains protein 1                                                | Q13642-1   | -0.658 | 0.010 |
| TUBA1A  | Tubulin alpha-1A<br>chain                                                               | Q71U36-2   | -0.653 | 0.019 |
| MARCKS  | Myristoylated<br>alanine-rich C-kinase<br>substrate                                     | P29966     | -0.650 | 0.002 |
| UCHL1   | Ubiquitin carboxyl-<br>terminal hydrolase<br>isozyme L1                                 | P09936     | -0.629 | 0.033 |
| LAMA4   | Laminin subunit<br>alpha-4                                                              | Q16363-2   | -0.619 | 0.016 |
| TCEAL3  | Transcription<br>elongation factor A<br>protein-like 3                                  | Q969E4     | -0.614 | 0.044 |
| TUBB4B  | Tubulin beta-4B<br>chain                                                                | P68371     | -0.595 | 0.014 |
| H3-2    | Histone<br>HIST2H3PS2                                                                   | Q5TEC6     | -0.574 | 0.001 |
| PTMS    | Parathymosin                                                                            | P20962     | -0.565 | 0.008 |
| PALM    | Paralemmin-1                                                                            | O75781-2   | -0.552 | 0.000 |
| RTN1    | Reticulon-1                                                                             | Q16799-3   | -0.551 | 0.038 |
| FBN3    | Fibrillin-3                                                                             | Q75N90     | -0.538 | 0.010 |
| MYEF2   | Myelin Expression<br>Factor 2                                                           | A0A087WUT0 | -0.537 | 0.001 |
| H2AC20  | Histone H2A type 2-<br>C                                                                | Q16777     | -0.531 | 0.008 |
| DPYSL2  | Dihydropyrimidinase-<br>related protein 2                                               | Q16555     | -0.529 | 0.014 |
| MAP1B   | Microtubule-<br>associated protein<br>1B                                                | P46821     | -0.527 | 0.020 |
| HDGFL3  | Hepatoma-derived<br>growth factor-related<br>protein 3                                  | Q9Y3E1     | -0.517 | 0.002 |
| CKB     | Creatine kinase B-<br>type                                                              | P12277     | -0.513 | 0.037 |
| KIF5C   | Kinesin heavy chain<br>isoform 5C                                                       | O60282     | -0.512 | 0.014 |
| SCRN1   | Secernin-1                                                                              | Q12765     | -0.510 | 0.004 |
| HP1BP3  | Heterochromatin<br>protein 1-binding<br>protein 3                                       | Q5SSJ5     | -0.509 | 0.000 |
| H3C1    | Histone H3.1                                                                            | P68431     | -0.502 | 0.010 |
| CPE     | Carboxypeptidase E                                                                      | D6RF88     | -0.501 | 0.040 |

|     | HSDL1 | Inactive<br>hydroxysteroid<br>dehydrogenase-like<br>protein 1 | Q3SXM5-2 | -0.501 | 0.021 |
|-----|-------|---------------------------------------------------------------|----------|--------|-------|
| 803 |       |                                                               |          |        |       |
| 804 |       |                                                               |          |        |       |
| 805 |       |                                                               |          |        |       |
| 806 |       |                                                               |          |        |       |
| 807 |       |                                                               |          |        |       |
| 808 |       |                                                               |          |        |       |
| 809 |       |                                                               |          |        |       |
| 810 |       |                                                               |          |        |       |
| 811 |       |                                                               |          |        |       |
| 812 |       |                                                               |          |        |       |
| 813 |       |                                                               |          |        |       |
| 814 |       |                                                               |          |        |       |
| 815 |       |                                                               |          |        |       |
| 816 |       |                                                               |          |        |       |
| 817 |       |                                                               |          |        |       |
| 818 |       |                                                               |          |        |       |
| 819 |       |                                                               |          |        |       |
| 820 |       |                                                               |          |        |       |
| 821 |       |                                                               |          |        |       |
| 822 |       |                                                               |          |        |       |
| 823 |       |                                                               |          |        |       |
| 824 |       |                                                               |          |        |       |
| 825 |       |                                                               |          |        |       |
| 826 |       |                                                               |          |        |       |
| 827 |       |                                                               |          |        |       |
| 828 |       |                                                               |          |        |       |
| 829 |       |                                                               |          |        |       |
| 830 |       |                                                               |          |        |       |
| 831 |       |                                                               |          |        |       |
| 832 |       |                                                               |          |        |       |
| 833 |       |                                                               |          |        |       |
| 834 |       |                                                               |          |        |       |
| 835 |       |                                                               |          |        |       |
| 836 |       |                                                               |          |        |       |
| 837 |       |                                                               |          |        |       |
| 838 |       |                                                               |          |        |       |
| 839 |       |                                                               |          |        |       |
| 840 |       |                                                               |          |        |       |
| 841 |       |                                                               |          |        |       |
| 842 |       |                                                               |          |        |       |
| 843 |       |                                                               |          |        |       |
| 844 |       |                                                               |          |        |       |
| 845 |       |                                                               |          |        |       |
| 846 |       |                                                               |          |        |       |
| 847 |       |                                                               |          |        |       |
| 848 |       |                                                               |          |        |       |
| 849 |       |                                                               |          |        |       |

850

**Table 2. 43 Up-Regulated Proteins in Scz Organoids (> 0.5 Log2FC,  $p < 0.05$ ).**

| Gene Name | Protein Name                                                      | Uniprot ID | Log2FC | P Value |
|-----------|-------------------------------------------------------------------|------------|--------|---------|
| SLC2A3    | Solute carrier family 2, facilitated glucose transporter member 3 | P11169     | 1.019  | 0.003   |
| GSTA2     | Glutathione S-transferase A2                                      | P09210     | 0.954  | 0.030   |
| PODXL     | Podocalyxin                                                       | O00592-2   | 0.939  | 0.000   |
| KRT18     | Keratin, type I cytoskeletal 18                                   | P05783     | 0.884  | 0.000   |
| AFP       | Alpha-fetoprotein                                                 | P02771     | 0.868  | 0.027   |
| S100A10   | Protein S100-A10                                                  | P60903     | 0.861  | 0.032   |
| AHSG      | Alpha-2-HS-glycoprotein                                           | P02765     | 0.843  | 0.001   |
| APOM      | Apolipoprotein M                                                  | O95445-2   | 0.771  | 0.002   |
| FGG       | Fibrinogen gamma chain                                            | P02679-2   | 0.768  | 0.010   |
| FGB       | Fibrinogen beta chain                                             | P02675     | 0.753  | 0.001   |
| FGA       | Fibrinogen alpha chain                                            | P02671-2   | 0.749  | 0.008   |
| LIN28A    | Protein lin-28 homolog A                                          | Q9H9Z2     | 0.731  | 0.001   |
| SLC9A3R1  | Na(+)/H(+) exchange regulatory cofactor NHE-RF1                   | O14745     | 0.726  | 0.001   |
| APOA1     | Apolipoprotein A-I                                                | P02647     | 0.715  | 0.015   |
| SERPINB9  | Serpin B9                                                         | P50453     | 0.712  | 0.001   |
| SERPINA1  | Alpha-1-antitrypsin                                               | P01009     | 0.705  | 0.009   |
| APOE      | Apolipoprotein E                                                  | P02649     | 0.698  | 0.006   |
| TF        | Serotransferrin                                                   | P02787     | 0.687  | 0.005   |
| S100A11   | Protein S100-A11                                                  | P31949     | 0.685  | 0.012   |
| APOC3     | Apolipoprotein C-III                                              | P02656     | 0.678  | 0.027   |
| EPCAM     | Epithelial cell adhesion molecule                                 | P16422     | 0.677  | 0.041   |
| FN1       | Fibronectin                                                       | P02751-5   | 0.650  | 0.010   |
| APOA4     | Apolipoprotein A-IV                                               | P06727     | 0.634  | 0.009   |
| PDLIM1    | PDZ and LIM domain protein 1                                      | O00151     | 0.624  | 0.000   |
| LCP1      | Plastin-2                                                         | P13796     | 0.611  | 0.005   |
| TINAGL1   | Tubulointerstitial nephritis antigen-like Tight junction protein  | Q9GZM7-3   | 0.591  | 0.043   |
| TJP2      | ZO-2                                                              | Q9UDY2-5   | 0.591  | 0.000   |
| SULT2A1   | Sulfotransferase 2A1                                              | Q06520     | 0.588  | 0.001   |
| HMGCS2    | Hydroxymethylglutaryl-CoA synthase, mitochondrial                 | P54868-2   | 0.580  | 0.009   |
| SNAP23    | Synaptosomal-associated protein 23                                | O00161     | 0.563  | 0.000   |
| DSP       | Desmoplakin                                                       | P15924     | 0.562  | 0.000   |
| APOB      | Apolipoprotein B-100                                              | P04114     | 0.562  | 0.015   |
| ELOA      | Elongin-A                                                         | Q14241     | 0.560  | 0.011   |

|         |                                                        |          |       |       |
|---------|--------------------------------------------------------|----------|-------|-------|
| UTP14A  | U3 small nucleolar RNA-associated protein 14 homolog A | Q9BVJ6-3 | 0.536 | 0.029 |
| FKBP11  | Peptidyl-prolyl cis-trans isomerase FKBP11             | Q9NYL4-2 | 0.534 | 0.021 |
| F11R    | Junctional adhesion molecule A                         | Q9Y624   | 0.534 | 0.001 |
| ARID3A  | AT-rich interactive domain-containing protein 3A       | Q99856   | 0.532 | 0.001 |
| OSBPL9  | Oxysterol-binding protein-related protein 9            | Q96SU4-7 | 0.531 | 0.001 |
| REEP6   | Receptor expression-enhancing protein 6                | Q96HR9-2 | 0.530 | 0.006 |
| ECHDC1  | Ethylmalonyl-CoA decarboxylase                         | Q9NTX5-2 | 0.524 | 0.007 |
| SCD     | Acyl-CoA desaturase                                    | O00767   | 0.509 | 0.001 |
| METTL7B | Methyltransferase-like protein 7B                      | Q6UX53   | 0.505 | 0.031 |
| DPP4    | Dipeptidyl peptidase 4                                 | P27487   | 0.500 | 0.031 |

---

851  
852  
853  
854  
855  
856  
857  
858  
859  
860  
861  
862  
863  
864  
865  
866  
867  
868  
869  
870  
871  
872  
873  
874  
875  
876



877

**Table 3. Down-Regulated GO Biological Processes in Scz Organoids ( $p < 0.05$ ).**

| <b>Biological Process</b>                                      | <b>GO:BP Term_ID</b> | <b>Adjusted <math>p</math> Value</b> | <b>Neg Log<sub>10</sub> Adjusted <math>p</math></b> |
|----------------------------------------------------------------|----------------------|--------------------------------------|-----------------------------------------------------|
| Axon Development<br>Nervous System                             | GO:0061564           | 1.88E-07                             | 6.725                                               |
| Development<br>Plasma Membrane<br>Bounded Cell<br>Projection   | GO:0007399           | 2.98E-07                             | 6.525                                               |
| Organization                                                   | GO:0120036           | 7.32E-07                             | 6.136                                               |
| Axonogenesis                                                   | GO:0007409           | 8.26E-07                             | 6.083                                               |
| Cell Projection<br>Organization                                | GO:0030030           | 1.16E-06                             | 5.937                                               |
| Cell Morphogenesis<br>Involved in Neuron<br>Differentiation    | GO:0048667           | 1.29E-06                             | 5.889                                               |
| Neuron Projection<br>Morphogenesis                             | GO:0048812           | 4.63E-06                             | 5.335                                               |
| Plasma Membrane<br>Bounded Cell<br>Projection<br>Morphogenesis | GO:0120039           | 6.03E-06                             | 5.219                                               |
| Cell Projection<br>Morphogenesis                               | GO:0048858           | 6.50E-06                             | 5.187                                               |
| Cell Part<br>Morphogenesis                                     | GO:0032990           | 8.89E-06                             | 5.051                                               |
| Cell Morphogenesis<br>Involved in<br>Differentiation<br>Neuron | GO:0000904           | 2.09E-05                             | 4.680                                               |
| Differentiation                                                | GO:0030182           | 4.18E-05                             | 4.379                                               |
| Cellular Component<br>Morphogenesis<br>Neuron                  | GO:0032989           | 4.21E-05                             | 4.375                                               |
| Development                                                    | GO:0048666           | 9.53E-05                             | 4.021                                               |
| Neuron Projection<br>Development                               | GO:0031175           | 0.000125503                          | 3.901                                               |
| Cell Morphogenesis                                             | GO:0000902           | 0.000170319                          | 3.769                                               |
| Generation of<br>Neurons<br>System                             | GO:0048699           | 0.000192896                          | 3.715                                               |
| Development                                                    | GO:0048731           | 0.000289587                          | 3.538                                               |
| Neurogenesis                                                   | GO:0022008           | 0.00059592                           | 3.225                                               |
| Multicellular<br>Organism<br>Development                       | GO:0007275           | 0.00099934                           | 3.000                                               |
| Anatomical<br>Structure<br>Development                         | GO:0048856           | 0.002063881                          | 2.685                                               |
| Axon Guidance                                                  | GO:0007411           | 0.002117016                          | 2.674                                               |
| Neuron Projection<br>Guidance                                  | GO:0097485           | 0.002173862                          | 2.663                                               |

|                                                                                |            |             |       |
|--------------------------------------------------------------------------------|------------|-------------|-------|
| Negative Regulation<br>of Microtubule<br>Polymerization or<br>Depolymerization | GO:0031111 | 0.011544881 | 1.938 |
| Microtubule-Based<br>Process                                                   | GO:0007017 | 0.01300057  | 1.886 |
| Cytoskeleton<br>Organization                                                   | GO:0007010 | 0.01330451  | 1.876 |
| Anatomical<br>Structure                                                        |            |             |       |
| Morphogenesis                                                                  | GO:0009653 | 0.014459529 | 1.840 |
| Regulation of Axon<br>Extension                                                | GO:0030516 | 0.015068023 | 1.822 |
| Developmental<br>Process                                                       | GO:0032502 | 0.01628204  | 1.788 |
| Substantia Nigra<br>Development                                                | GO:0021762 | 0.018211464 | 1.740 |
| Microtubule<br>Cytoskeleton<br>Organization                                    | GO:0000226 | 0.023833988 | 1.623 |
| Regulation of Extent<br>of Cell Growth                                         | GO:0061387 | 0.027856692 | 1.555 |
| Axon Extension                                                                 | GO:0048675 | 0.047873583 | 1.320 |

---

878  
879  
880  
881  
882  
883  
884  
885  
886  
887  
888  
889  
890  
891  
892  
893  
894  
895  
896  
897  
898  
899  
900  
901  
902  
903

904

**Table 4. Up-Regulated GO Biological Processes in Scz Organoids ( $p < 0.05$ ).**

| <b>Biological Process</b>                                          | <b>GO:BP Term_ID</b> | <b>Adjusted <math>p</math> Value</b> | <b>Neg Log10 Adjusted <math>p</math></b> |
|--------------------------------------------------------------------|----------------------|--------------------------------------|------------------------------------------|
| Chylomicron Remodeling                                             | GO:0034371           | 1.03E-08                             | 7.988                                    |
| Chylomicron Assembly                                               | GO:0034378           | 3.76E-08                             | 7.425                                    |
| Plasma Lipoprotein Particle Assembly                               | GO:0034377           | 1.15E-07                             | 6.938                                    |
| Triglyceride-Rich Lipoprotein Particle Remodeling                  | GO:0034370           | 1.62E-07                             | 6.790                                    |
| Plasma Lipoprotein Particle Remodeling                             | GO:0034369           | 1.73E-07                             | 6.762                                    |
| Protein-Lipid Complex Remodeling                                   | GO:0034368           | 1.73E-07                             | 6.762                                    |
| Protein-Containing Complex Remodeling                              | GO:0034367           | 2.53E-07                             | 6.598                                    |
| Complex Assembly                                                   | GO:0065005           | 2.53E-07                             | 6.598                                    |
| High-Density Lipoprotein Particle Remodeling                       | GO:0034375           | 6.89E-07                             | 6.162                                    |
| Reverse Cholesterol Transport                                      | GO:0043691           | 2.10E-06                             | 5.677                                    |
| Plasma Lipoprotein Particle Organization                           | GO:0071827           | 3.08E-06                             | 5.511                                    |
| Protein-Lipid Complex Subunit Organization                         | GO:0071825           | 4.88E-06                             | 5.312                                    |
| Cholesterol Efflux                                                 | GO:0033344           | 1.47E-05                             | 4.832                                    |
| Terpenoid Metabolic Process                                        | GO:0006721           | 1.85E-05                             | 4.733                                    |
| Very-Low-Density Lipoprotein Particle Remodeling                   | GO:0034372           | 1.97E-05                             | 4.706                                    |
| Platelet Degranulation                                             | GO:0002576           | 2.31E-05                             | 4.636                                    |
| Sterol Transport                                                   | GO:0015918           | 2.44E-05                             | 4.612                                    |
| Phospholipid Efflux                                                | GO:0033700           | 2.84E-05                             | 4.547                                    |
| Isoprenoid Metabolic Process                                       | GO:0006720           | 5.53E-05                             | 4.257                                    |
| Positive Regulation of Substrate Adhesion-Dependent Cell Spreading | GO:1900026           | 6.58E-05                             | 4.182                                    |
| High-Density Lipoprotein Particle                                  | GO:0034380           | 7.18E-05                             | 4.144                                    |

|                      |            |             |       |
|----------------------|------------|-------------|-------|
| Assembly             |            |             |       |
| Cell-Cell Adhesion   | GO:0098609 | 8.60E-05    | 4.066 |
| High-Density         |            |             |       |
| Lipoprotein Particle |            |             |       |
| Clearance            | GO:0034384 | 0.000120368 | 3.919 |
| Cholesterol          |            |             |       |
| Homeostasis          | GO:0042632 | 0.000156831 | 3.805 |
| Post-Translational   |            |             |       |
| Protein Modification | GO:0043687 | 0.000163138 | 3.787 |
| Sterol Homeostasis   | GO:0055092 | 0.000166565 | 3.778 |
| Retinoid Metabolic   |            |             |       |
| Process              | GO:0001523 | 0.00024961  | 3.603 |
| Regulation of        |            |             |       |
| Plasma Lipoprotein   |            |             |       |
| Particle Levels      | GO:0097006 | 0.000263855 | 3.579 |
| Regulation of        |            |             |       |
| Substrate Adhesion-  |            |             |       |
| Dependent Cell       |            |             |       |
| Spreading            | GO:1900024 | 0.000344919 | 3.462 |
| Diterpenoid          |            |             |       |
| Metabolic Process    | GO:0016101 | 0.000345502 | 3.462 |
| Cholesterol          |            |             |       |
| Transport            | GO:0030301 | 0.000383496 | 3.416 |
| Heterotypic Cell-    |            |             |       |
| Cell Adhesion        | GO:0034113 | 0.000409755 | 3.387 |
| Cholesterol          |            |             |       |
| Biosynthetic         |            |             |       |
| Process              | GO:0006695 | 0.000568257 | 3.245 |
| Secondary Alcohol    |            |             |       |
| Biosynthetic         |            |             |       |
| Process              | GO:1902653 | 0.000568257 | 3.245 |
| Regulation of        |            |             |       |
| Heterotypic Cell-    |            |             |       |
| Cell Adhesion        | GO:0034114 | 0.000580431 | 3.236 |
| Regulation of Cdc42  |            |             |       |
| Protein Signal       |            |             |       |
| Transduction         | GO:0032489 | 0.000667476 | 3.176 |
| Sterol Biosynthetic  |            |             |       |
| Process              | GO:0016126 | 0.000893117 | 3.049 |
| Plasma Lipoprotein   |            |             |       |
| Particle Clearance   | GO:0034381 | 0.000959187 | 3.018 |
| Lipoprotein          |            |             |       |
| Metabolic Process    | GO:0042157 | 0.001034387 | 2.985 |
| Chylomicron          |            |             |       |
| Remnant Clearance    | GO:0034382 | 0.001066283 | 2.972 |
| Triglyceride-Rich    |            |             |       |
| Lipoprotein Particle |            |             |       |
| Clearance            | GO:0071830 | 0.001066283 | 2.972 |
| Steroid Metabolic    |            |             |       |
| Process              | GO:0008202 | 0.00122924  | 2.910 |
| Cholesterol          | GO:0008203 | 0.001569372 | 2.804 |

|                                                                       |            |             |       |
|-----------------------------------------------------------------------|------------|-------------|-------|
| Metabolic Process                                                     |            |             |       |
| Positive Regulation of Cholesterol Esterification                     | GO:0010873 | 0.001596909 | 2.797 |
| Regulated Exocytosis                                                  | GO:0045055 | 0.00171245  | 2.766 |
| Positive Regulation of Cell Morphogenesis Involved in Differentiation | GO:0010770 | 0.00174483  | 2.758 |
| Very-Low-Density Lipoprotein Particle Clearance                       | GO:0034447 | 0.002277712 | 2.643 |
| Secondary Alcohol Metabolic Process                                   | GO:1902652 | 0.002312476 | 2.636 |
| Homotypic Cell-Cell Adhesion                                          | GO:0034109 | 0.002650901 | 2.577 |
| Triglyceride Catabolic Process                                        | GO:0019433 | 0.002810211 | 2.551 |
| Sterol Metabolic Process                                              | GO:0016125 | 0.002987054 | 2.525 |
| Acylglycerol Homeostasis                                              | GO:0055090 | 0.003467959 | 2.460 |
| Triglyceride Homeostasis                                              | GO:0070328 | 0.003467959 | 2.460 |
| Lipid Homeostasis                                                     | GO:0055088 | 0.003686054 | 2.433 |
| Vesicle-Mediated Transport                                            | GO:0016192 | 0.003686287 | 2.433 |
| Regulation of Triglyceride                                            |            |             |       |
| Metabolic Process                                                     | GO:0090207 | 0.004233532 | 2.373 |
| Regulation of Cell Morphogenesis Involved in Differentiation          | GO:0010769 | 0.004547582 | 2.342 |
| Secretion                                                             | GO:0046903 | 0.004648136 | 2.333 |
| Cell Adhesion                                                         | GO:0007155 | 0.00503037  | 2.298 |
| Biological Adhesion                                                   | GO:0022610 | 0.005314483 | 2.275 |
| Organic Hydroxy Compound Transport                                    | GO:0015850 | 0.005357541 | 2.271 |
| Intermembrane Lipid Transfer                                          | GO:0120009 | 0.006131955 | 2.212 |
| Exocytosis                                                            | GO:0006887 | 0.006499986 | 2.187 |
| Steroid Biosynthetic Process                                          | GO:0006694 | 0.006623642 | 2.179 |
| Cdc42 Protein                                                         |            |             |       |
| Signal Transduction                                                   | GO:0032488 | 0.006865718 | 2.163 |
| Regulation of Cholesterol                                             | GO:0010872 | 0.006865718 | 2.163 |

|                                                       |            |             |       |
|-------------------------------------------------------|------------|-------------|-------|
| Ssterification                                        |            |             |       |
| Regulation of Triglyceride                            |            |             |       |
| Catabolic Process                                     | GO:0010896 | 0.006865718 | 2.163 |
| Acylglycerol                                          |            |             |       |
| Catabolic Process                                     | GO:0046464 | 0.007287829 | 2.137 |
| Neutral Lipid                                         |            |             |       |
| Catabolic Process                                     | GO:0046461 | 0.007287829 | 2.137 |
| Substrate Adhesion-Dependent Cell Spreading           | GO:0034446 | 0.008081591 | 2.093 |
| Negative Regulation of Plasma Lipoprotein Oxidation   | GO:0034445 | 0.008917017 | 2.050 |
| Regulation of Plasma Lipoprotein Oxidation            | GO:0034444 | 0.008917017 | 2.050 |
| Secretion by Cell                                     | GO:0032940 | 0.009039373 | 2.044 |
| Triglyceride                                          |            |             |       |
| Metabolic Process                                     | GO:0006641 | 0.00964557  | 2.016 |
| Positive Regulation of Cell Adhesion                  | GO:0045785 | 0.009890818 | 2.005 |
| Regulation of Cell Morphogenesis                      | GO:0022604 | 0.01018014  | 1.992 |
| Positive Regulation of Heterotypic Cell-Cell Adhesion | GO:0034116 | 0.010529465 | 1.978 |
| Regulation of Cell-Cell Adhesion                      | GO:0022407 | 0.011281044 | 1.948 |
| Negative Regulation of Blood Coagulation              | GO:0030195 | 0.01262872  | 1.899 |
| Negative Regulation of Hemostasis                     | GO:1900047 | 0.013577968 | 1.867 |
| Export from Cell                                      | GO:0140352 | 0.014773845 | 1.831 |
| Cholesterol                                           |            |             |       |
| Esterification                                        | GO:0034435 | 0.015294749 | 1.815 |
| Steroid                                               |            |             |       |
| Esterification                                        | GO:0034433 | 0.015294749 | 1.815 |
| Sterol Esterification                                 | GO:0034434 | 0.015294749 | 1.815 |
| Positive Regulation of Cell-Substrate Adhesion        | GO:0010811 | 0.01579924  | 1.801 |
| Negative Regulation of Coagulation                    | GO:0050819 | 0.019135052 | 1.718 |
| Lipid Catabolic Process                               | GO:0016042 | 0.020745205 | 1.683 |
| Platelet Aggregation                                  | GO:0070527 | 0.023183729 | 1.635 |
| Plasma Lipoprotein Particle Oxidation                 | GO:0034441 | 0.026712669 | 1.573 |

|                      |            |             |       |
|----------------------|------------|-------------|-------|
| Acylglycerol         |            |             |       |
| Metabolic Process    | GO:0006639 | 0.028359777 | 1.547 |
| Neutral Lipid        |            |             |       |
| Metabolic Process    | GO:0006638 | 0.029346144 | 1.532 |
| Supramolecular       |            |             |       |
| Fiber Organization   | GO:0097435 | 0.029625    | 1.528 |
| Cell Activation      | GO:0001775 | 0.029657104 | 1.528 |
| Macromolecule        |            |             |       |
| Localization         | GO:0033036 | 0.029741556 | 1.527 |
| Transport            | GO:0006810 | 0.030983148 | 1.509 |
| Organic Hydroxy      |            |             |       |
| Compound             |            |             |       |
| Biosynthetic         |            |             |       |
| Process              | GO:1901617 | 0.031015934 | 1.508 |
| Regulation of Blood  |            |             |       |
| Coagulation          | GO:0030193 | 0.033129732 | 1.480 |
| Alcohol Biosynthetic |            |             |       |
| Process              | GO:0046165 | 0.035839906 | 1.446 |
| Regulation of        |            |             |       |
| Hemostasis           | GO:1900046 | 0.037051615 | 1.431 |
| Plasminogen          |            |             |       |
| Activation           | GO:0031639 | 0.037580747 | 1.425 |
| Regulation of        |            |             |       |
| Lipoprotein Lipase   |            |             |       |
| Activity             | GO:0051004 | 0.037580747 | 1.425 |
| Regulation of        |            |             |       |
| Localization         | GO:0032879 | 0.04005842  | 1.397 |
| Glycerolipid         |            |             |       |
| Catabolic Process    | GO:0046503 | 0.041304441 | 1.384 |
| Vascular Process in  |            |             |       |
| Circulatory System   | GO:0003018 | 0.041522396 | 1.382 |
| Regulation of        |            |             |       |
| Vesicle-Mediated     |            |             |       |
| Transport            | GO:0060627 | 0.044575903 | 1.351 |
| Regulation of        |            |             |       |
| Cholesterol          |            |             |       |
| Transport            | GO:0032374 | 0.045905316 | 1.338 |
| Regulation of Sterol |            |             |       |
| Transport            | GO:0032371 | 0.045905316 | 1.338 |
| Fibrinolysis         | GO:0042730 | 0.048124122 | 1.318 |
| Regulation of        |            |             |       |
| Coagulation          | GO:0050818 | 0.048341707 | 1.316 |

---

905  
906  
907  
908  
909  
910  
911  
912  
913

914 **Table 5. Down-Regulated GO Molecular Functions in Scz Organoids ( $p < 0.05$ ).**

| <b>Molecular Function</b>                                                          | <b>GO:MF Term_ID</b> | <b>Adjusted <math>p</math> Value</b> | <b>Neg Log10 Adjusted <math>p</math></b> |
|------------------------------------------------------------------------------------|----------------------|--------------------------------------|------------------------------------------|
| Structural Constituent of Cytoskeleton                                             | GO:0005200           | 0.000173652                          | 3.760                                    |
| Cytoskeletal Protein Binding                                                       | GO:0008092           | 0.005488124                          | 2.261                                    |
| GTPase Activity                                                                    | GO:0003924           | 0.007451524                          | 2.128                                    |
| Nucleoside-Triphosphatase Activity                                                 | GO:0017111           | 0.008195516                          | 2.086                                    |
| Pyrophosphatase Activity                                                           | GO:0016462           | 0.020438022                          | 1.690                                    |
| Hydrolase Activity, Acting on Acid Anhydrides, in Phosphorus-Containing Anhydrides | GO:0016818           | 0.023962071                          | 1.620                                    |
| Hydrolase Activity, Acting on Acid Anhydrides                                      | GO:0016817           | 0.024306171                          | 1.614                                    |
| Tubulin Binding                                                                    | GO:0015631           | 0.034081605                          | 1.467                                    |
| GTP Binding                                                                        | GO:0005525           | 0.034081605                          | 1.467                                    |
| Microtubule Binding                                                                | GO:0008017           | 0.043893561                          | 1.358                                    |
| Structural Molecule Activity                                                       | GO:0005198           | 0.047624863                          | 1.322                                    |
| Guanyl Ribonucleotide Binding                                                      | GO:0032561           | 0.047641356                          | 1.322                                    |
| Guanyl Nucleotide Binding                                                          | GO:0019001           | 0.047641356                          | 1.322                                    |

915  
916  
917  
918  
919  
920  
921  
922  
923  
924  
925  
926  
927  
928  
929  
930  
931  
932  
933



934 **Table 6. Up-Regulated GO Molecular Functions in Scz Organoids ( $p < 0.05$ ).**

| <b>Molecular Function</b>                        | <b>GO:MF Term_ID</b> | <b>Adjusted <math>p</math> Value</b> | <b>Neg Log10 Adjusted <math>p</math></b> |
|--------------------------------------------------|----------------------|--------------------------------------|------------------------------------------|
| Sterol Transporter Activity                      | GO:0015248           | 4.01E-06                             | 5.397                                    |
| Cadherin Binding Involved in Cell-Cell Adhesion  | GO:0098641           | 2.28E-05                             | 4.642                                    |
| Cell-Cell Adhesion Mediator Activity             | GO:0098632           | 2.68E-05                             | 4.571                                    |
| Cholesterol Transfer Activity                    | GO:0120020           | 5.42E-05                             | 4.266                                    |
| Cell Adhesion Mediator Activity                  | GO:0098631           | 6.36E-05                             | 4.197                                    |
| Sterol Transfer Activity                         | GO:0120015           | 6.55E-05                             | 4.184                                    |
| Phosphatidylcholine-Sterol O-Acyltransferase     | GO:0060228           | 7.46E-05                             | 4.127                                    |
| Activator Activity                               | GO:0050839           | 7.67E-05                             | 4.115                                    |
| Cell Adhesion Molecule Binding                   | GO:0070325           | 0.000150248                          | 3.823                                    |
| Lipoprotein Particle Receptor Binding            | GO:0005319           | 0.000343266                          | 3.464                                    |
| Lipid Transporter Activity                       | GO:0120013           | 0.001163791                          | 2.934                                    |
| Lipid Transfer Activity                          | GO:0032934           | 0.003401382                          | 2.468                                    |
| Sterol Binding High-Density Lipoprotein Particle | GO:0070653           | 0.005374955                          | 2.270                                    |
| Receptor Binding                                 | GO:0005496           | 0.025672825                          | 1.591                                    |
| Steroid Binding                                  | GO:0005102           | 0.031882878                          | 1.496                                    |
| Signaling Receptor Binding                       |                      |                                      |                                          |

935  
936  
937  
938  
939  
940  
941  
942  
943  
944  
945  
946  
947  
948  
949  
950  
951

952

**Table 7. Down-Regulated Reactome Pathways in Scz Organoids ( $p < 0.05$ ).**

| <b>Reactome Pathway</b>                                                          | <b>Reactome Term_ID</b> | <b>Adjusted <math>p</math> Value</b> | <b>Neg Log10 Adjusted <math>p</math></b> |
|----------------------------------------------------------------------------------|-------------------------|--------------------------------------|------------------------------------------|
| L1CAM Interactions                                                               | REAC:R-HSA-373760       | 4.04E-07                             | 6.393                                    |
| Microtubule-Dependent Trafficking of Connexons from Golgi to the Plasma Membrane | REAC:R-HSA-190840       | 7.37E-07                             | 6.133                                    |
| Transport of Connexons to the Plasma Membrane                                    | REAC:R-HSA-190872       | 9.65E-07                             | 6.015                                    |
| Recycling Pathway of L1                                                          | REAC:R-HSA-437239       | 1.35E-06                             | 5.869                                    |
| Post-Chaperonin Tubulin Folding Pathway                                          | REAC:R-HSA-389977       | 2.00E-06                             | 5.698                                    |
| COPI-Independent Golgi-to-ER Retrograde Traffic                                  | REAC:R-HSA-6811436      | 2.51E-06                             | 5.601                                    |
| Formation of Tubulin Folding Intermediates by CCT/TriC                           | REAC:R-HSA-389960       | 3.09E-06                             | 5.510                                    |
| Activation of AMPK Downstream of NMDARs                                          | REAC:R-HSA-9619483      | 4.59E-06                             | 5.338                                    |
| Prefoldin Mediated Transfer of Substrate to CCT/TriC                             | REAC:R-HSA-389957       | 4.59E-06                             | 5.338                                    |
| Sealing of the Nuclear Envelope (NE) by ESCRT-III                                | REAC:R-HSA-9668328      | 9.34E-06                             | 5.030                                    |
| RHO GTPases Activate IQGAPs                                                      | REAC:R-HSA-5626467      | 9.34E-06                             | 5.030                                    |
| Cooperation of Prefoldin and TriC/CCT in Actin and Tubulin Folding               | REAC:R-HSA-389958       | 1.10E-05                             | 4.959                                    |
| Gap Junction Assembly                                                            | REAC:R-HSA-190861       | 2.30E-05                             | 4.638                                    |
| HCMV Early Events Assembly and Cell Surface                                      | REAC:R-HSA-9609690      | 3.03E-05                             | 4.518                                    |
| Presentation of NMDA Receptors                                                   | REAC:R-HSA-9609736      | 4.36E-05                             | 4.360                                    |
| Aggrephagy                                                                       | REAC:R-HSA-9646399      | 4.91E-05                             | 4.309                                    |

|                                                                                   |                        |             |       |
|-----------------------------------------------------------------------------------|------------------------|-------------|-------|
| Carboxyterminal<br>Post-Translational<br>Modifications of<br>Tubulin              | REAC:R-HSA-<br>8955332 | 6.18E-05    | 4.209 |
| Gap Junction<br>Trafficking                                                       | REAC:R-HSA-<br>190828  | 8.54E-05    | 4.069 |
| HCMV Infection<br>Gap Junction<br>Trafficking and<br>Regulation                   | REAC:R-HSA-<br>9609646 | 9.31E-05    | 4.031 |
| Intraflagellar<br>Transport                                                       | REAC:R-HSA-<br>157858  | 9.47E-05    | 4.024 |
| HSP90 Chaperone<br>Cycle for Steroid<br>Hormone Receptors<br>(SHR)                | REAC:R-HSA-<br>5620924 | 0.000140206 | 3.853 |
| Kinesins                                                                          | REAC:R-HSA-<br>3371497 | 0.000184495 | 3.734 |
| Nuclear Envelope<br>(NE) Reassembly                                               | REAC:R-HSA-<br>983189  | 0.000259999 | 3.585 |
| Translocation of<br>SLC2A4 (GLUT4) to<br>the Plasma<br>Membrane                   | REAC:R-HSA-<br>2995410 | 0.000519297 | 3.285 |
| Golgi-to-ER<br>Retrograde<br>Transport                                            | REAC:R-HSA-<br>1445148 | 0.000597876 | 3.223 |
| Axon Guidance<br>Post NMDA<br>Receptor Activation<br>Events                       | REAC:R-HSA-<br>8856688 | 0.000664661 | 3.177 |
| The Role of GTSE1<br>in G2/M Progression<br>after G2 Checkpoint                   | REAC:R-HSA-<br>422475  | 0.00067359  | 3.172 |
| Nervous System<br>Development                                                     | REAC:R-HSA-<br>438064  | 0.000783019 | 3.106 |
| Selective Autophagy<br>Activation of NMDA<br>Receptors and<br>Postsynaptic Events | REAC:R-HSA-<br>8852276 | 0.000949362 | 3.023 |
| Recruitment of<br>NuMA to Mitotic<br>Centrosomes                                  | REAC:R-HSA-<br>9675108 | 0.001007002 | 2.997 |
| Chaperonin-<br>Mediated Protein<br>Folding                                        | REAC:R-HSA-<br>9663891 | 0.001010583 | 2.995 |
| Factors Involved in<br>Megakaryocyte                                              | REAC:R-HSA-<br>442755  | 0.00171304  | 2.766 |
|                                                                                   | REAC:R-HSA-<br>380320  | 0.002242316 | 2.649 |
|                                                                                   | REAC:R-HSA-<br>390466  | 0.002362049 | 2.627 |
|                                                                                   | REAC:R-HSA-<br>983231  | 0.002639065 | 2.579 |

|                                                                                      |                    |             |       |
|--------------------------------------------------------------------------------------|--------------------|-------------|-------|
| Development and Platelet Production                                                  |                    |             |       |
| COPI-Dependent Golgi-to-ER Retrograde Traffic                                        | REAC:R-HSA-6811434 | 0.003037982 | 2.517 |
| COPI-Mediated Anterograde Transport                                                  | REAC:R-HSA-6807878 | 0.003347233 | 2.475 |
| Protein Folding                                                                      | REAC:R-HSA-391251  | 0.003347233 | 2.475 |
| CRMPs in Sema3A Signaling                                                            | REAC:R-HSA-399956  | 0.003988868 | 2.399 |
| Hedgehog 'off' State Neurotransmitter Receptors and Postsynaptic Signal Transmission | REAC:R-HSA-5610787 | 0.005515212 | 2.258 |
| EML4 and NUDC in Mitotic Spindle Formation                                           | REAC:R-HSA-112314  | 0.005949918 | 2.225 |
| Cilium Assembly Intra-Golgi and Retrograde Golgi-to-ER traffic                       | REAC:R-HSA-9648025 | 0.006005753 | 2.221 |
| Resolution of Sister Chromatid Cohesion                                              | REAC:R-HSA-5617833 | 0.006863941 | 2.163 |
| MHC Class II Antigen Presentation                                                    | REAC:R-HSA-6811442 | 0.007259898 | 2.139 |
| RHO GTPase Effectors                                                                 | REAC:R-HSA-2500257 | 0.008317829 | 2.080 |
| Developmental Biology                                                                | REAC:R-HSA-2132295 | 0.008317829 | 2.080 |
| Macroautophagy                                                                       | REAC:R-HSA-195258  | 0.0094632   | 2.024 |
| RHO GTPases Activate Formins                                                         | REAC:R-HSA-1266738 | 0.011666055 | 1.933 |
| Signaling by Hedgehog                                                                | REAC:R-HSA-1632852 | 0.012565891 | 1.901 |
| Autophagy ER to Golgi Anterograde Transport                                          | REAC:R-HSA-5663220 | 0.013491876 | 1.870 |
| Transmission across Chemical Synapses                                                | REAC:R-HSA-5358351 | 0.02087328  | 1.680 |
| M Phase                                                                              | REAC:R-HSA-9612973 | 0.02087328  | 1.680 |
|                                                                                      | REAC:R-HSA-199977  | 0.025184333 | 1.599 |
|                                                                                      | REAC:R-HSA-112315  | 0.028395357 | 1.547 |
|                                                                                      | REAC:R-HSA-68886   | 0.044247896 | 1.354 |

955

**Table 8. Up-Regulated Reactome Pathways in Scz Organoids ( $p < 0.05$ ).**

| Reactome Pathway                                                                                                            | Reactome Term_ID   | Adjusted $p$ Value | Neg Log <sub>10</sub> Adjusted $p$ |
|-----------------------------------------------------------------------------------------------------------------------------|--------------------|--------------------|------------------------------------|
| Post-Translational Protein Phosphorylation                                                                                  | REAC:R-HSA-8957275 | 8.31E-09           | 8.080                              |
| Chylomicron Assembly                                                                                                        | REAC:R-HSA-8963888 | 1.82E-08           | 7.739                              |
| Chylomicron Remodeling                                                                                                      | REAC:R-HSA-8963901 | 1.82E-08           | 7.739                              |
| Regulation of Insulin-like Growth Factor (IGF) Transport and Uptake by Insulin-like Growth Factor Binding Proteins (IGFBPs) | REAC:R-HSA-381426  | 3.18E-08           | 7.498                              |
| Plasma Lipoprotein Assembly                                                                                                 | REAC:R-HSA-8963898 | 6.10E-07           | 6.215                              |
| Retinoid Metabolism and Transport                                                                                           | REAC:R-HSA-975634  | 1.25E-06           | 5.902                              |
| Metabolism of Fat-Soluble Vitamins                                                                                          | REAC:R-HSA-6806667 | 2.16E-06           | 5.665                              |
| Plasma Lipoprotein Remodeling                                                                                               | REAC:R-HSA-8963899 | 9.87E-06           | 5.006                              |
| Platelet Degranulation                                                                                                      | REAC:R-HSA-114608  | 3.04E-05           | 4.517                              |
| Response to Elevated Platelet Cytosolic Ca <sup>2+</sup>                                                                    | REAC:R-HSA-76005   | 3.98E-05           | 4.400                              |
| Regulation of TLR by Endogenous Ligand                                                                                      | REAC:R-HSA-5686938 | 0.000100533        | 3.998                              |
| Visual Phototransduction                                                                                                    | REAC:R-HSA-2187338 | 0.000156361        | 3.806                              |
| Metabolism of Vitamins and Cofactors                                                                                        | REAC:R-HSA-196854  | 0.000455116        | 3.342                              |
| Plasma Lipoprotein Assembly, Remodeling, and Clearance                                                                      | REAC:R-HSA-174824  | 0.000616778        | 3.210                              |
| HDL remodeling                                                                                                              | REAC:R-HSA-8964058 | 0.000786847        | 3.104                              |
| Hemostasis                                                                                                                  | REAC:R-HSA-109582  | 0.001130796        | 2.947                              |
| GRB2:SOS Provides Linkage to MAPK Signaling for Integrins                                                                   | REAC:R-HSA-354194  | 0.003373717        | 2.472                              |
| Platelet Activation,                                                                                                        | REAC:R-HSA-        | 0.003972412        | 2.401                              |

|                                                 |                    |             |       |
|-------------------------------------------------|--------------------|-------------|-------|
| Signaling and Aggregation                       | 76002              |             |       |
| p130Cas Linkage to MAPK Signaling for Integrins | REAC:R-HSA-372708  | 0.004208218 | 2.376 |
| Scavenging by Class A Receptors                 | REAC:R-HSA-3000480 | 0.008886469 | 2.051 |
| Common Pathway of Fibrin Clot Formation         | REAC:R-HSA-140875  | 0.014033493 | 1.853 |
| Integrin Signaling                              | REAC:R-HSA-354192  | 0.023493017 | 1.629 |
| Chylomicron Clearance                           | REAC:R-HSA-8964026 | 0.032311883 | 1.491 |
| Scavenging by Class B Receptors                 | REAC:R-HSA-3000471 | 0.032311883 | 1.491 |
| Integrin Cell Surface Interactions              | REAC:R-HSA-216083  | 0.043417684 | 1.362 |
| Plasma Lipoprotein Clearance                    | REAC:R-HSA-8964043 | 0.044251662 | 1.354 |

---

956  
957  
958  
959  
960  
961  
962  
963  
964  
965  
966  
967  
968  
969  
970  
971  
972  
973  
974  
975  
976  
977  
978  
979  
980  
981  
982  
983

984 **FIGURES & LEGENDS**

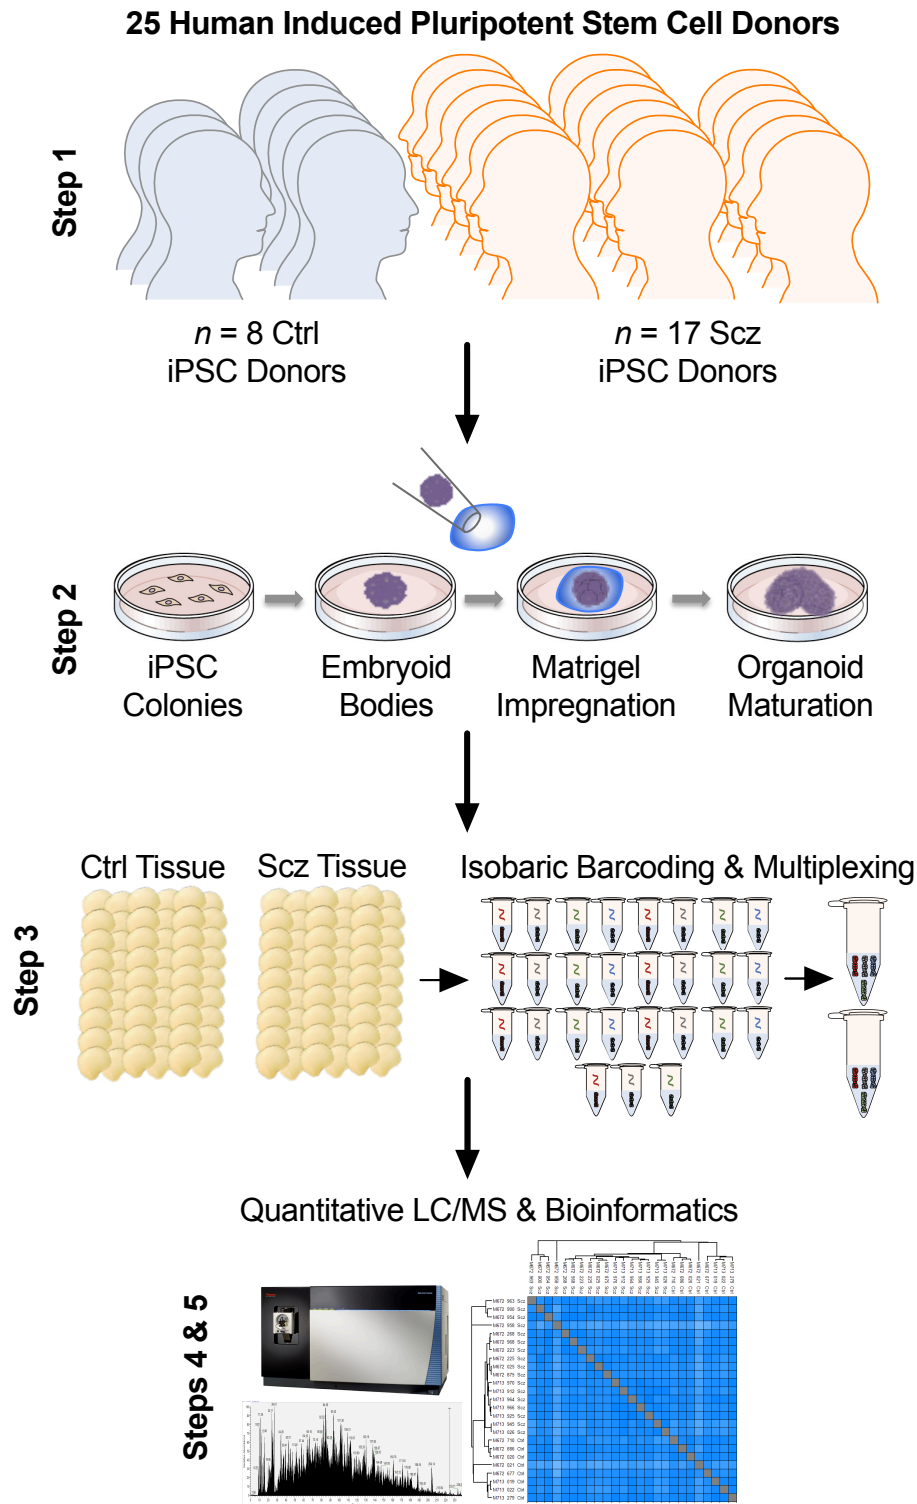

985

986

987

988

989

**Figure 1. Schematic of cerebral organoid and TMT-LC/MS analytical pipeline.**

Briefly, 25 distinct human iPSCs were obtained from both healthy Control (Ctrl)

donors and Schizophrenia (Scz) patients. Each line represented a biologically

990 unique sample from a specific individual, and lines were predominantly obtained  
991 from NIH repositories. Following this, iPSCs were expanded and utilized to  
992 generate patient-derived cerebral organoids that mimic the 1<sup>st</sup> trimester of brain  
993 assembly (see Methods, [17, 88] for protocol information, and [1] for our previous  
994 application of 3D Scz patient-derived organoids). This process involved  
995 dissociating iPSC colonies to generate 3D embryoid body aggregates that could be  
996 pushed towards a neural fate via chemically minimalist media cocktails [17, 88].  
997 Following neural induction, organoids were implanted into a matrigel droplet as a  
998 scaffold to support tissue expansion and, consistent with our prior study [55],  
999 matured to a primary endpoint of 30DIV. Following this, samples were  
1000 individually subjected to protein lysis and tryptic-based enzymatic digestion. For  
1001 proteomic analysis of cerebral organoids, peptides were isobarically barcoded  
1002 using TMTpro 16-Plex chemistry that allowed samples to be multiplexed for  
1003 simultaneous analysis of different samples via liquid-chromatography/mass-  
1004 spectrometry. This allowed up to 15 samples (+1 pool) to be condensed into a  
1005 single tube for simultaneous detection via liquid-chromatography mass-  
1006 spectrometry (LC/MS) analysis, resulting in a total of 27 samples ( $n = 25$  human  
1007 donor organoids, +  $n = 2$  internal reference pools). Proteomic nano-LC tandem  
1008 mass spectrometry analysis was performed on a Fusion Lumos to molecularly map  
1009 the protein composition of  $n = 25$  of our iPSC human donor samples.  
1010 Bioinformatics were subsequently conducted in accordance with the parameters  
1011 described in our Methods as well as two prior manuscripts that have incorporated  
1012 LC/MS proteomic analysis of human-derived organoid samples [1, 11].  
1013  
1014  
1015  
1016  
1017  
1018  
1019  
1020  
1021  
1022  
1023  
1024  
1025  
1026  
1027



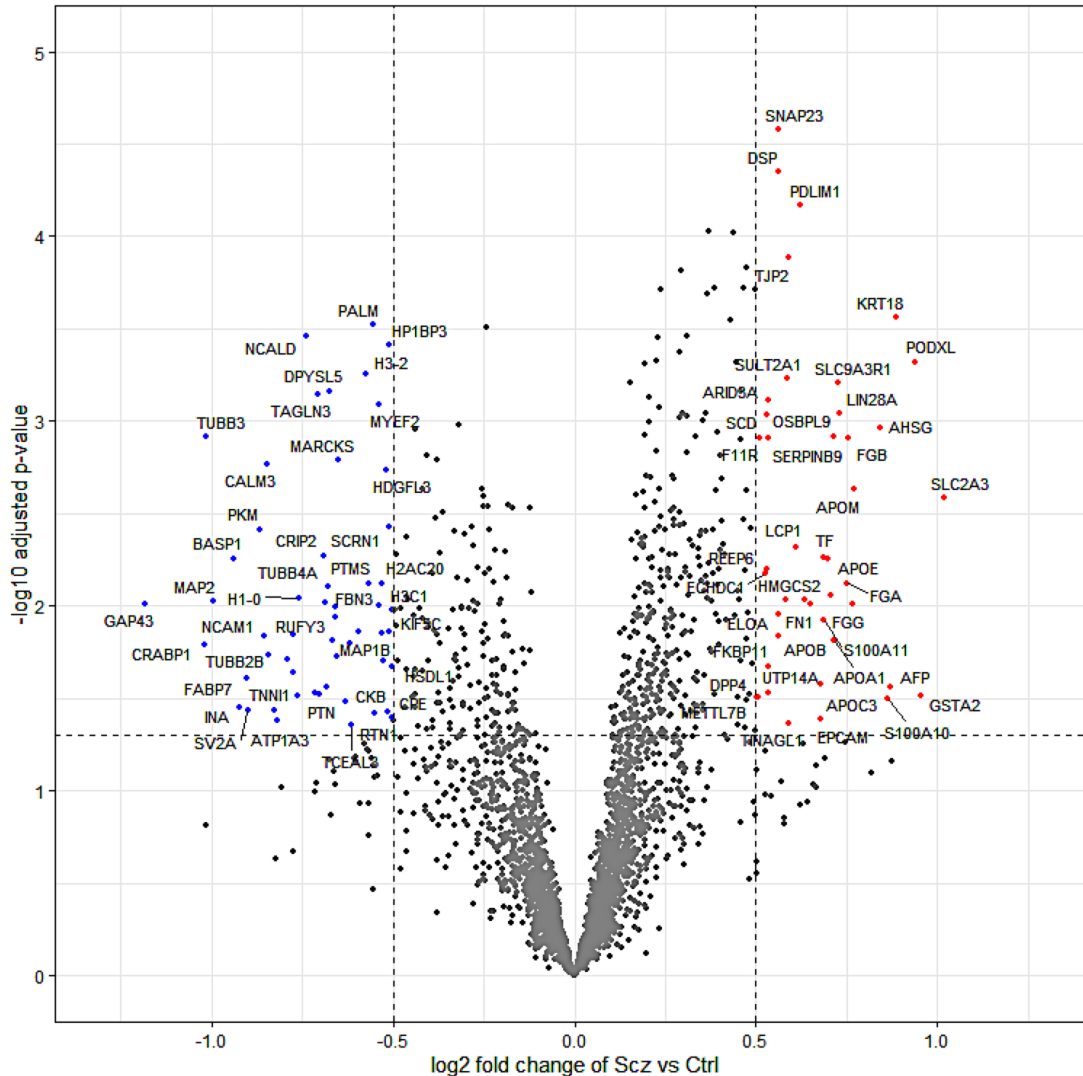

1028 **Figure 2. Differential Expression in the Scz Cerebral Organoid Proteome.**  
1029 Principal component analysis of the cerebral organoid proteome indicated data  
1030 grouping based on phenotype, and protein expression distributions indicated data  
1031 correlation across all samples. This statistical baseline allowed us to consider the  
1032 differentially expressed proteins present in Scz patient-derived cerebral organoids,  
1033 which are shown here as a volcano plot split by log<sub>2</sub> fold change and -log<sub>10</sub>  
1034 adjusted *p* values. In sum, ~2.62% of 3705 proteins (peptide >1; intensity > 0)  
1035 identified exhibited differential expression. Significantly up-regulated proteins that  
1036 surpassed log<sub>2</sub> fold change thresholding are depicted to the right in red (*p* value <  
1037 0.05, Log<sub>2</sub>FC > 0.05), whereas down-regulated proteins (*p* value < 0.05, Log<sub>2</sub>FC <  
1038 -0.05) are presented to the left of the plot in blue. Notable Scz GWAS factors (see  
1039 108 loci identified in [33]) included the up-regulation of PODXL and down-  
1040 regulation of PTN, which replicated our previous findings in a smaller cohort [1].  
1041 Note also the down-regulation of the neural stem cell proliferation factor CRABP1  
1042 [94] as well as canonical neuronal development markers (e.g. NCAM1 [95],  
1043 NCALD [96], and CPE [79]), neuronal markers (e.g. MAP2, TUBB3, MAP1B),

1044 synaptic markers (e.g., SV2A). Conversely, a range of apolipoproteins (APOE,  
1045 APOA1, APOB, APOC3) were found to be up-regulated in Scz patient-derived  
1046 cerebral organoids.

# 25 Human Induced Pluripotent Stem Cell Donors

**Step 1**

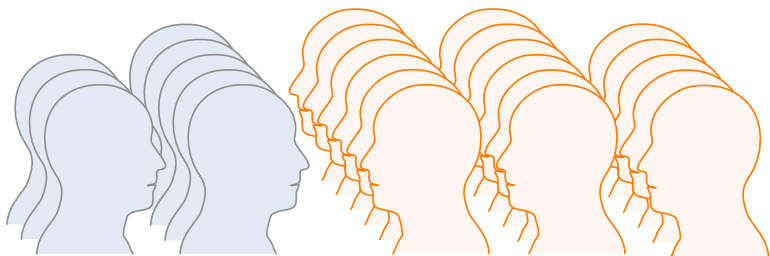

*n* = 8 Ctrl  
iPSC Donors

*n* = 17 Scz  
iPSC Donors

**Step 2**

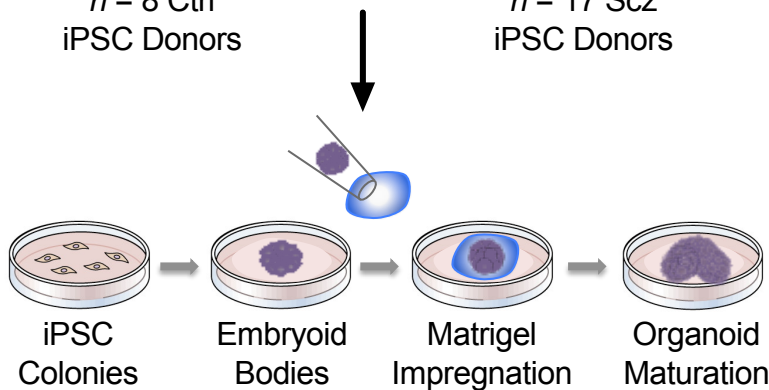

**Step 3**

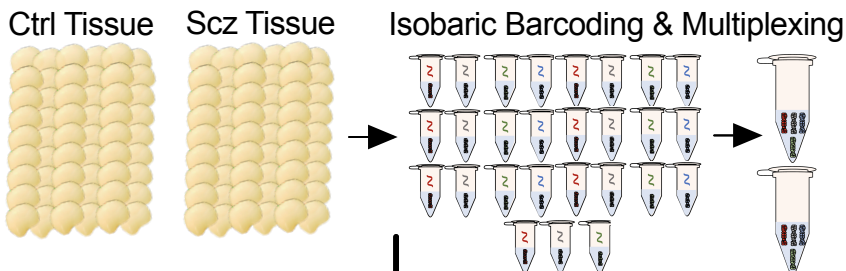

Quantitative LC/MS & Bioinformatics

**Steps 4 & 5**

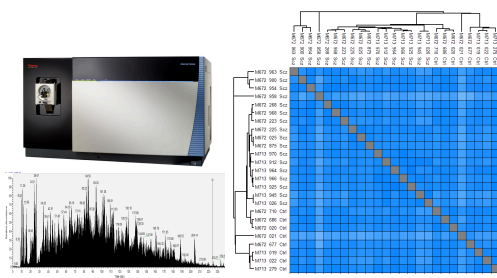

Source: https://www.biorxiv.org/content/10.1101/2021.08.11.455952v1.full.pdf
